# Supplementary material for: Csf2rb-Dependent Development of Yolk Sac-Derived Macrophages Drives Persistent Pro-Tumorigenic Activity
Source: Research Square preprint supplement (doi:10.21203/rs.3.rs-7182707/v1), 2025-08-05
Supplement: Supplementary file 1 [file ceaa51b08b5729bb7470266a.xlsx]

## Sheet: Bulk RNA-seq of KCs gene expres
GeneID	YFP- KCs_1	YFP- KCs_2	YFP+ KCs_1	YFP+ KCs_2
Acvr1	16.1318	15.9301	3.18785	0.489071
Acvr1b	0.325528	0.685053	0.464703	0.091414
Acvr1c	0.012409	0.012816	0	0
Acvr2a	1.64847	1.79898	0.306404	0.04058
Acvr2b	4.55909	4.28716	2.59711	1.22835
Acvrl1	28.9142	37.1928	34.3152	18.9271
Amh	0.021833	0	0	0
Amhr2	0.20482	0.14852	0.057979	0.118601
Bmp10	0	0	0	0
Bmp15	0.081407	0	0	0
Bmp2	6.12067	7.16189	1.6099	0.94494
Bmp3	0	0	0	0
Bmp4	0.291965	1.06386	0	0
Bmp5	0.041762	0	0	0
Bmp6	0.675341	2.66434	0.220273	0.047908
Bmp7	0.637317	0.704865	0.085648	0.058698
Bmp8a	0.032561	0.219126	0.091798	0.048108
Bmp8b	0	0.116979	0	0
Bmpr1a	2.55455	1.89952	0.506625	0.120844
Bmpr1b	0.061762	0	0	0
Bmpr2	2.31106	2.0053	0.544419	0
Ccl1	2.91709	0.45809	0	0
Ccl11	0	0	0	0
Ccl12	29.3227	22.635	7.58935	3.0868
Ccl17	8.34479	1.82878	3.49978	1.5372
Ccl19	0.862259	0.210986	0	0.566924
Ccl2	27.3853	26.8169	48.3546	76.0647
Ccl20	0.314031	0	0	0
Ccl21a	0	0	0	0
Ccl21b	0	0	0	0
Ccl22	5.95082	11.3994	1.99081	1.82592
Ccl24	92.987	31.8342	209.655	123.151
Ccl25	2.43324	0.56749	2.6964	0
Ccl26	0	0.450118	0.304656	0
Ccl27a	1.36193	1.30332	0.629062	0
Ccl27b	0.13239	0	0	0
Ccl28	0.089074	0	0	0
Ccl3	191.643	162.729	95.4274	170.351
Ccl4	382.45	268.43	566.893	1341.76
Ccl5	1043.58	109.116	147.354	290.198
Ccl6	158.706	80.1697	327.342	231.701
Ccl7	6.67723	12.0131	13.2243	15.365
Ccl8	2.34631	7.97903	1.2441	1.70063
Ccl9	26.3095	17.3228	5.53337	2.86939
Ccr1	11.6822	36.7011	2.96417	1.99922
Ccr10	0.046205	0	0.077854	0
Ccr1l1	2.3952	1.64021	0.243347	0
Ccr2	10.6965	25.7775	2.19873	0.679755
Ccr3	4.18222	2.19449	0.790726	0.133344
Ccr4	0.142814	0.255379	0.061912	0
Ccr5	63.9745	66.8536	29.3736	7.52191
Ccr6	56.8925	38.9309	3.71888	0.822184
Ccr7	52.7088	96.9857	26.5591	11.2031
Ccr8	1.86353	0.565193	0.164536	0.300312
Ccr9	1.95444	4.31899	0.74381	0.078777
Cd27	6.16306	6.36343	4.98286	2.32969
Cd4	3.33261	6.5887	5.82151	1.73406
Cd40	16.2212	16.1351	36.2173	19.233
Cd40lg	1.63001	4.67513	0.853604	0.260977
Cd70	0.07704	0	0	0
Clcf1	10.0872	22.8543	5.65095	1.50968
Cntf	1.14845	0	1.02876	0.235069
Cntfr	0.073758	0	0	0
Crlf2	9.56117	13.6268	32.5169	69.6195
Csf1	7.1806	11.1335	1.32144	0.370793
Csf1r	2835.33	3689.83	2754.57	2334.94
Csf2	0.78073	0	0	0
Csf2ra	48.2118	56.0304	178.672	242.635
Csf2rb	38.8507	98.0539	99.4784	97.6745
Csf2rb2	17.4854	25.2399	26.8894	21.0135
Csf3	0.151959	1.26077	4.81446	6.51075
Csf3r	64.9739	158.447	23.7625	13.6625
Ctf1	0.246	0	0	0
Ctf2	0	0	0	0
Cx3cl1	4.58864	4.47416	0.628372	0.05498
Cx3cr1	314.29	352.565	25.0589	1.33479
Cxcl1	32.0833	32.7424	378.872	311.312
Cxcl10	86.31	84.0546	332.239	580.347
Cxcl11	0.337508	0.040471	0.090241	0
Cxcl12	78.854	28.4686	4.13049	0.341759
Cxcl13	31.9122	46.7993	46.8016	151.85
Cxcl14	4.18883	3.50105	1.23973	0.093951
Cxcl15	0.015791	0	0	0
Cxcl16	53.3452	70.3421	142.149	116.515
Cxcl17	0.084558	0	0	0
Cxcl2	96.7362	153.991	1071.22	2114.38
Cxcl3	0.764072	3.17322	5.00216	12.6186
Cxcl5	0	0	0	0
Cxcl9	16.0178	10.3157	7.4358	2.62674
Cxcr1	0.029049	0.955279	0.196368	0.102721
Cxcr2	0.48761	7.94591	0.696557	0.90168
Cxcr3	18.3797	15.6715	9.70279	4.56402
Cxcr4	24.6733	7.76538	2.98922	0.373406
Cxcr5	8.72707	33.8565	10.4457	1.79627
Cxcr6	19.0913	15.7629	2.76179	0.363108
Ebi3	50.8248	40.5008	101.272	68.3568
Eda	0.01599	0.020392	0	0
Eda2r	0.12903	0.085662	0	0
Edar	0.133817	0	0.032088	0
Epo	0	0	0	0
Epor	3.17917	6.3184	2.89889	2.017
Fas	16.4745	5.97487	2.45482	1.28252
Fasl	7.28719	9.4736	1.58208	0.20855
Gdf1	0.473291	1.25043	0.025301	0.042324
Gdf10	0.306865	0.223129	0	0
Gdf11	0.133489	0.426223	0.034438	0
Gdf15	5.81323	26.0989	56.7194	283.546
Gdf2	0.053909	0.197167	0.041467	0.048945
Gdf3	0.096814	0.298355	0.320759	0.186136
Gdf5	0	0.049965	0	0
Gdf6	0	0	0	0
Gdf7	0	0	0	0
Gdf9	2.41351	1.50569	1.19492	0.437317
Gh	0.502136	0.285599	0.236124	0
Ghr	3.16327	0.737826	0.240292	0
Gm10591	0	0	0	0
Gm13304	0	0	0	0
Gm13305	0	0	0	0
Gm13306	0.144173	0	0	0
Ifna1	0.050791	0.101463	0.109417	0
Ifna11	0	0	0	0
Ifna12	0	0	0	0
Ifna13	0	0	0	0
Ifna14	0	0	0	0
Ifna2	0.095353	0	0	0
Ifna4	0	0	0.186586	0
Ifna5	0	0	0	0
Ifna6	0	0	0	0
Ifna7	0	0	0	0
Ifna9	0	0	0	0
Ifnab	0	0	0	0
Ifnar1	31.9481	38.7075	11.5881	2.92365
Ifnar2	154.495	126.127	265.742	143.043
Ifnb1	0.128627	0.300436	0.345046	0.095966
Ifne	0	0	0	0
Ifng	13.7354	4.65641	2.25822	1.2343
Ifngr1	293.801	334.677	206.324	94.5966
Ifngr2	54.2301	79.7645	54.1703	29.9774
Ifnk	0.110719	0	0	0
Il10	22.7164	33.7296	259.576	125.893
Il10ra	169.171	276.909	92.0445	33.9041
Il10rb	97.3143	147.759	102.861	46.6128
Il11	0	0	0	0
Il11ra1	12.585	21.9104	9.02334	3.97358
Il11ra2	0.934036	1.55084	0.417084	0
Il12a	3.5998	0.265127	0.350191	0
Il12b	0.457686	4.56841	0.54557	0.299631
Il12rb1	0.948131	3.89385	1.00652	1.69852
Il12rb2	1.32974	4.29413	0.582042	0
Il13	0	0	0	0
Il13ra1	27.9349	28.7799	10.0856	2.64469
Il13ra2	0.758652	0	0	0
Il15	22.5567	10.8631	16.5242	4.31714
Il15ra	19.2641	12.2642	13.8722	3.58077
Il16	32.9755	55.7425	20.0254	7.3545
Il17a	0.130867	0.249576	0.05326	0
Il17b	0	0	0	0
Il17c	0.049926	0	0	0.17054
Il17d	0	0	0	0
Il17f	0.723989	0	0	0
Il17ra	15.2063	31.7402	14.7523	7.90092
Il17rb	0.486842	0.152278	0.097185	0.04114
Il17rc	1.10833	1.9307	0.339679	0.144761
Il17re	0.181422	0.061258	0.065493	0.039365
Il18	56.4513	10.0279	47.3663	22.79
Il18r1	1.89994	0.994641	0.335122	0.08497
Il18rap	2.0832	6.75945	0.68682	0.30191
Il19	0.095752	0	0	0
Il1a	52.3478	74.2146	39.0009	23.452
Il1b	134.482	550.66	1998.58	2980.25
Il1f10	0	0	0	0
Il1r1	0.76341	1.35082	0.2638	0
Il1r2	21.5197	48.4269	7.41311	13.0074
Il1rap	2.57445	3.41271	0.821115	0.171629
Il1rl1	0.744399	0.53468	0.036897	0
Il1rl2	1.37343	1.49043	0.244528	0
Il1rn	16.1277	73.1901	21.0814	11.4452
Il2	0.987429	0	0.098625	0
Il20	0	0	0	0
Il20ra	0	0.055396	0	0
Il20rb	1.32395	2.00956	1.62907	0.760251
Il21	0	0	0	0
Il21r	13.0496	28.4081	7.07493	3.08406
Il22	0.059876	0	0	0
Il22ra1	0	0	0	0
Il23a	0.047412	0.454784	0.795197	0.308976
Il23r	0.057044	0	0	0
Il24	0.020294	0	0	0
Il25	0.081501	0	0	0
Il27	2.03675	3.90426	5.92507	5.80078
Il27ra	6.75109	5.21034	1.30401	0.374003
Il2ra	0.830067	0.842053	0.161318	0
Il2rb	14.1712	98.7898	10.7323	6.0892
Il2rg	127.434	107.314	124.583	54.9718
Il3	0	0	0	0
Il31	0	0	0	0
Il31ra	0.053114	0.378832	0.110521	0
Il33	0.431904	0.617196	0.159967	0
Il34	0.812441	0.811394	0	0.062818
Il3ra	0.624963	1.5979	0.971551	4.4943
Il4	3.77693	0.833675	0.154886	0
Il4ra	17.2139	50.3015	33.9254	22.0723
Il5	0	0	0	0
Il5ra	0.553411	0.491651	0.216561	0
Il6	48.0777	20.9979	111.057	58.0535
Il6ra	20.7976	54.1595	10.6812	9.94569
Il6st	34.4748	41.0867	7.82531	0.977192
Il7	0.081442	0.097535	0.142421	0.258147
Il7r	25.129	10.3344	2.09299	0.267485
Il9	0	0	0	0
Il9r	0.340904	0.785514	0.401031	0.22301
Inha	0.080941	0	0	0
Inhba	0.797675	1.38009	0.167918	0.315139
Inhbb	0.254153	0.249095	0.046855	0.057345
Inhbc	0.079306	0.081892	0.093382	0.058473
Inhbe	0	0	0	0
Klk1b4	0	0	0	0
Lep	0	0	0	0
Lepr	0.604179	0.506123	0.171528	0.076762
Lif	0.071809	0.762571	0.021126	0.171678
Lifr	12.0072	6.97486	1.64202	0.235427
Lta	1.01496	0.908837	0.95498	0.096842
Ltb	15.8354	16.8304	12.9199	7.14719
Ltbr	27.7841	67.7993	45.2085	34.9057
Mpl	0.089387	0.178869	0	0
Mstn	0.021157	0	0	0
Ngf	0.133871	0.140971	0	0
Ngfr	0.139707	0.319224	0.075503	0.033899
Nodal	0.112061	0	0	0
Osm	33.8949	53.1764	4.47932	12.7414
Osmr	6.08845	2.72012	0.628319	0.098305
Pf4	24.7715	32.8282	22.1327	7.57158
Ppbp	2.91466	1.11526	0.212512	0
Prl	0	0	0	0
Prl5a1	0	0	0	0
Prl6a1	0	0	0	0
Prlr	0.63468	0.605912	0.051268	0.022359
Rell1	5.57667	7.1257	2.90478	1.31364
Rell2	0.61161	1.18195	0.829521	0.700423
Relt	7.03392	22.5812	17.087	14.6902
Tgfb1	12.5848	22.4532	14.6473	14.2276
Tgfb2	3.28892	1.53693	0.108668	0
Tgfb3	1.44874	6.13033	4.84938	1.3473
Tgfbr1	82.8748	49.5378	6.56265	1.28338
Tgfbr2	161.412	171.116	8.07057	7.67269
Thpo	0.079422	0	0.025814	0
Tnf	34.6601	104.515	112.181	130.754
Tnfrsf10b	0.871907	0.266823	0.207532	0.097093
Tnfrsf11a	8.75344	7.52943	3.9079	1.06661
Tnfrsf11b	0.021011	0	0	0
Tnfrsf12a	7.54251	4.38606	4.39705	1.07442
Tnfrsf13b	17.2279	11.3591	1.31876	0.478558
Tnfrsf13c	9.5143	15.3137	12.8646	1.99256
Tnfrsf14	1.22219	1.24492	1.00244	0.699044
Tnfrsf17	14.8747	9.016	1.56713	0
Tnfrsf18	11.6953	5.17384	4.51653	3.53905
Tnfrsf19	11.8314	6.21387	0.524816	0
Tnfrsf1a	116.381	263.29	129.709	120.395
Tnfrsf1b	51.0123	130.923	61.2323	36.3404
Tnfrsf21	51.3871	77.1304	15.2529	8.55146
Tnfrsf25	3.74204	2.32586	0.850113	0.37766
Tnfrsf4	6.41622	2.15056	2.1295	1.38683
Tnfrsf8	0.07336	0	0.153114	0
Tnfrsf9	1.99218	10.8378	1.81513	0.943868
Tnfsf10	3.58443	3.13139	1.02008	0.27121
Tnfsf11	0.410568	0.558586	0.0919	0
Tnfsf12	18.5054	17.9397	11.8401	6.27045
Tnfsf13	5.53834	6.79148	13.3598	5.00315
Tnfsf13b	6.23111	5.61217	0.815284	0.311199
Tnfsf14	2.14223	3.25689	0.874468	1.13302
Tnfsf15	0.072179	0.18623	0.112637	0
Tnfsf18	0.227749	0.107224	0.08219	0
Tnfsf4	0.040586	0.386997	0	0
Tnfsf8	0.601348	0.965109	0.117178	0
Tnfsf9	6.82259	10.7413	5.93658	7.30613
Tslp	1.90669	0.43579	2.20574	0.904562
Xcl1	105.027	10.9101	8.68756	12.3723
Xcr1	4.27394	8.03777	1.01672	0.245109
44256	30.863	30.023	9.00195	1.45096
44257	51.0359	39.5039	65.3141	35.9483
44258	0.439909	0.183929	0.118322	0.190539
44259	0.016844	0	0.014796	0.03116
44260	12.5899	5.64555	8.12464	2.21418
44261	11.7282	15.5115	3.5602	0.813142
44262	7.43105	15.4757	3.71542	0.494277
44263	5.0964	6.98483	2.89648	0.599469
44264	0.701728	0.295149	0.123091	0
44265	0.217819	0.094069	0	0
44266	0.039258	0	0	0
44440	22.6979	16.2736	16.2076	12.2206
44441	43.1264	5.69292	13.2793	3.19342
44442	1.32683	2.77121	0.098952	0.121617
44443	27.1224	12.526	3.32189	1.03418
44444	1.77324	1.37683	0.197629	0.166104
44445	14.1524	16.8425	4.80633	1.38015
44446	30.5875	27.3228	8.76113	3.37624
44447	6.15374	5.6865	2.91897	1.16665
44448	22.8459	82.9955	41.4977	25.7026
44449	1.48949	0.958509	0.812211	0.168531
44450	10.3653	12.3388	2.41387	0.653375
44451	0	0	0	0
44453	0	0	0	0
44454	193.252	94.7194	136.145	78.9951
100043387	1.91768	0.891013	0.248983	0.083645
0610005C13Rik	0.812566	0.353833	0.875406	0.270295
0610007C21Rik	128.703	52.3716	47.4297	14.7489
0610007L01Rik	6.19328	11.4474	7.05688	2.18905
0610007N19Rik	2.25486	0.854313	0.216303	0.077855
0610007P08Rik	2.71272	2.8641	0.5506	0.025856
0610007P14Rik	15.1339	12.3288	9.42373	4.20507
0610007P22Rik	15.0424	10.4388	8.15773	4.44833
0610008F07Rik	0	0	0	0
0610009B14Rik	0	0	0	0
0610009B22Rik	16.8741	5.73682	2.49235	1.22188
0610009D07Rik	64.6004	10.5915	16.851	7.90347
0610009L18Rik	5.2661	1.21329	4.17497	1.55251
0610009O20Rik	31.0663	63.7028	24.6188	11.2715
0610010B08Rik	0.599067	0.197502	0.051225	0.0153
0610010F05Rik	1.57119	1.43411	0.435361	0
0610010K14Rik	83.5811	41.5176	45.4729	34.9447
0610010O12Rik	4.03069	1.83319	7.6071	3.90748
0610011F06Rik	20.0617	8.7059	11.9588	7.12992
0610011L14Rik	13.1005	26.1108	6.50198	2.44572
0610012G03Rik	30.069	10.8284	34.6975	44.4988
0610012H03Rik	0.040798	0	0	0
0610030E20Rik	7.06762	5.87432	3.78884	1.46298
0610031J06Rik	109.88	91.242	93.0245	52.8058
0610031O16Rik	0	0	0	0
0610037L13Rik	32.9918	17.1612	12.8616	3.48051
0610037P05Rik	16.2345	10.3751	7.26481	2.28888
0610038B21Rik	0.064103	0	0.020475	0
0610038L08Rik	0.024204	0	0	0
0610039K10Rik	0.716704	0.22586	0.456116	0.04573
0610040B10Rik	0.869225	0.704521	0	0
0610040F04Rik	0.080749	0	0	0
0610040J01Rik	46.8603	34.1861	11.1318	2.64011
0610043K17Rik	0.049363	0	0	0
0910001L09Rik	88.6073	37.1392	53.1329	62.8796
1100001G20Rik	13.5195	12.3018	8.11728	24.6312
1110001A16Rik	19.8675	8.25141	4.97818	1.87074
1110001J03Rik	25.6649	7.96822	14.849	11.4857
1110002B05Rik	56.1778	22.3983	17.2673	6.10052
1110002L01Rik	0.383403	1.27304	0.119982	0
1110002N22Rik	9.00731	5.95294	5.46237	1.45183
1110003E01Rik	54.5405	23.0305	14.7144	5.67875
1110004E09Rik	7.87976	3.9635	3.20901	1.62582
1110004F10Rik	45.4454	26.1796	16.5425	6.72959
1110005A03Rik	52.8699	15.3402	23.4253	7.4971
1110006O24Rik	0.868016	0.555747	0.676731	0.755192
1110007C09Rik	29.3068	22.5473	31.3419	39.0806
1110008F13Rik	92.6634	1.70285	12.7047	6.24833
1110008J03Rik	0.775947	1.40268	1.89193	1.23151
1110008L16Rik	3.70081	5.06517	1.08877	0.230152
1110008P14Rik	25.8965	5.67306	10.7819	16.0213
1110012J17Rik	0.143832	0.069663	0	0
1110012L19Rik	12.9321	5.90576	7.48804	1.67672
1110014N23Rik	13.1082	20.8431	12.7448	9.72461
1110015O18Rik	0	0	0	0
1110017D15Rik	0.933813	0.397083	0.527654	0
1110017F19Rik	0.464097	0.476918	0.095716	0.232634
1110018G07Rik	15.7045	24.8855	6.45747	1.35747
1110018J18Rik	3.75527	2.5573	2.06609	0.589964
1110019D14Rik	1.66811	1.15101	0.353611	0
1110020A21Rik	0.804998	0.096729	0	0
1110020G09Rik	3.54722	2.26706	0.8944	0.2409
1110021J02Rik	4.18791	3.88378	2.98473	1.02507
1110021L09Rik	4.70265	3.25231	0.30097	0.040698
1110028C15Rik	3.1471	2.52283	0.775132	0.127984
1110028F11Rik	0.105016	0	0	0
1110028F18Rik	0.036523	0	0	0
1110031I02Rik	13.9505	9.00482	11.2158	4.82633
1110032A03Rik	10.6038	3.17729	3.59909	0.466759
1110032A04Rik	0	0	0	0
1110032F04Rik	0.053364	0.044867	0.00629	0
1110034A24Rik	2.33988	3.12742	2.05768	1.05294
1110034B05Rik	2.57178	1.96373	0.841359	0
1110034G24Rik	13.3513	6.6963	7.35366	2.7427
1110035M17Rik	4.827	2.14965	1.37975	0.966098
1110036E04Rik	0	0	0	0
1110037F02Rik	7.52766	13.0996	2.90286	0.489854
1110038B12Rik	61.0476	16.5353	31.6305	21.4626
1110038D17Rik	15.9193	46.1395	17.1191	7.83678
1110038F14Rik	26.4627	14.7661	17.3244	9.03174
1110046J04Rik	1.36181	0	2.5244	0.723165
1110049F12Rik	13.1267	4.05514	6.63145	1.39707
1110050K14Rik	0.945192	0.991357	0.096172	0
1110051M20Rik	9.01009	5.0788	3.38037	0.621536
1110054M08Rik	6.24294	2.88567	2.99633	1.78999
1110054O05Rik	12.454	12.2135	4.72857	1.0902
1110057K04Rik	16.3586	24.8176	7.90124	1.73477
1110058L19Rik	27.5682	7.21059	8.97769	4.59123
1110059E24Rik	22.7803	5.33347	4.63921	0.588074
1110059G10Rik	3.89413	1.27449	1.59794	0.372725
1110059M19Rik	1.59911	0.842389	0	0
1110065P20Rik	8.90995	4.90768	4.08464	5.56283
1110067D22Rik	3.83157	2.0292	0.539089	0.031763
1190002F15Rik	6.23803	2.07155	2.73689	1.98449
1190002H23Rik	53.5097	21.9473	4.88455	2.91552
1190002N15Rik	5.35704	2.81419	0.869146	0.137576
1190003J15Rik	4.37943	0	0.919806	0.311311
1190003K10Rik	0	0	0	0
1190005F20Rik	16.2836	25.7063	6.35775	2.05457
1190005I06Rik	0.288556	0	0	0
1190007F08Rik	4.14558	1.08079	1.15095	0.824532
1190007I07Rik	7.95521	2.01439	4.20383	2.48926
1200009I06Rik	1.66523	1.09149	2.39307	1.78751
1200011I18Rik	6.05291	4.15053	1.99368	0.445392
1200011M11Rik	9.50614	16.2273	4.01639	0.79637
1200014J11Rik	5.26259	5.27548	2.08195	0.403848
1200016B10Rik	8.47661	5.60553	2.09912	0.294313
1300001I01Rik	6.00378	11.9049	7.27474	4.17589
1300002E11Rik	14.8916	3.43538	8.33865	2.56695
1300002K09Rik	0.411128	0.713273	0.210427	0.064037
1300010F03Rik	5.58266	7.70409	1.52926	0.378176
1300014I06Rik	15.2411	21.121	22.4754	9.23916
1300015D01Rik	0.101418	0.065887	0	0
1300017J02Rik	0.2615	3.68847	0.716336	0.691399
1300018I17Rik	20.8704	35.2852	14.4646	10.4918
1300018J18Rik	7.41243	6.30402	3.22969	0.927189
1500001M20Rik	11.1145	7.42366	8.78447	2.27947
1500002O10Rik	0	0	0	0
1500002O20Rik	13.326	24.9306	10.3456	10.2223
1500003O03Rik	35.9786	65.3006	18.8063	4.18007
1500004A13Rik	0.337836	1.01309	0.121946	0.059004
1500009C09Rik	0.458076	0.266811	0.059742	0
1500009L16Rik	1.2129	0.371078	0.246545	0
1500010J02Rik	39.1494	47.6032	10.8805	4.73672
1500011B03Rik	13.1553	5.04419	10.103	3.62216
1500011H22Rik	12.7013	6.34348	4.51462	0.61554
1500011K16Rik	10.7055	4.39708	4.55542	4.36304
1500012F01Rik	99.9357	18.3074	50.2796	51.248
1500012K07Rik	0	0	0	0
1500015A07Rik	0.987897	0.369011	0.582967	0.123263
1500015L24Rik	0	0	0	0
1500015O10Rik	8.5176	4.9289	0.461201	0
1500016L03Rik	0.071513	0	0	0
1500017E21Rik	0	0	0	0
1500031L02Rik	4.94013	4.20397	2.4493	0.517675
1500032L24Rik	178.155	55.1652	138.734	197.166
1520402A15Rik	1.4149	0.34449	0	0
1600002D24Rik	0	0.21926	0	0.081788
1600002H07Rik	3.239	3.87916	1.86249	0.828451
1600002K03Rik	14.8592	6.59063	14.3367	7.86692
1600010M07Rik	15.4521	3.44124	9.74966	4.0498
1600012F09Rik	4.58069	2.28592	1.00972	0.496647
1600012H06Rik	10.1077	7.25349	4.62209	1.82186
1600014C10Rik	16.4377	27.1304	6.51053	3.64106
1600014C23Rik	0	0	0	0
1600014K23Rik	0	0	0	0
1600015I10Rik	0	0	0	0
1600016N20Rik	0.296615	0.620718	0.265801	0
1600019K03Rik	0	0	0	0
1600020E01Rik	35.2533	8.48788	8.54362	2.09518
1600021P15Rik	1.34737	1.50093	0.437518	0.070475
1600025M17Rik	0	0	0	0
1600027N09Rik	8.60483	14.2801	4.5811	2.21582
1600029D21Rik	0.221804	0.140508	0.033785	0.125091
1600029I14Rik	0.122995	0	0	0.133633
1600029O15Rik	0.025257	0.06394	0	0.069271
1700001C02Rik	0.091718	0	0	0
1700001C19Rik	2.66466	1.36249	0.2274	0
1700001D01Rik	0	0	0	0
1700001F09Rik	0	0	0	0
1700001G11Rik	0.208195	0	0.137333	0
1700001G17Rik	0.036728	0.13011	0	0
1700001J03Rik	0.162978	0.25324	0.482587	0
1700001J11Rik	0.002117	0	0	0
1700001K19Rik	0.159862	0.087268	0.06843	0
1700001K23Rik	0.160924	0	0	0
1700001L05Rik	0.369016	0.333259	0.154088	0.091808
1700001L19Rik	0.017159	0	0	0
1700001O22Rik	0.33471	0	0	0
1700001P01Rik	0.03291	0	0	0
1700003C15Rik	0	0	0	0
1700003D09Rik	0	0	0	0
1700003E16Rik	0.195719	0.220803	0.034173	0
1700003F12Rik	0.901594	1.55644	1.59166	3.12405
1700003F17Rik	0.114137	0.25938	0	0
1700003G13Rik	0	0	0	0
1700003G18Rik	0	0	0	0
1700003H04Rik	0	0	0	0
1700003L19Rik	0	0	0	0
1700003M02Rik	0.083912	0.067405	0	0
1700003M07Rik	0.50262	0.906452	0	0
1700003P14Rik	0	0	0	0
1700006A11Rik	0	0	0	0
1700006E09Rik	0.057029	0	0	0
1700006F04Rik	0	0	0	0
1700006H21Rik	0	0	0	0
1700007B14Rik	0	0	0	0
1700007F19Rik	0	0	0	0
1700007G11Rik	0	0	0	0
1700007I08Rik	0.013632	0.07706	0	0
1700007J10Rik	0.015725	0.09842	0	0
1700007K09Rik	0.048301	0	0	0
1700007K13Rik	0.308579	0.143865	0	0
1700007L15Rik	2.00951	1.00029	1.10208	1.03866
1700007P06Rik	0	0	0	0
1700008A04Rik	0.031655	0	0	0
1700008F21Rik	0	0	0	0
1700008I05Rik	0	0	0	0
1700008J07Rik	1.47666	0.574216	0.905424	0.294027
1700008K24Rik	0	0	0	0
1700008O03Rik	0.193155	0	0.153808	0
1700008P02Rik	0	0	0	0
1700008P20Rik	0.015724	0	0.022995	0
1700009C05Rik	0	0	0	0
1700009J07Rik	0.452383	0.554837	0.119757	0
1700009N14Rik	0	0	0	0
1700009P17Rik	6.495	3.00952	8.73242	6.6068
1700010B08Rik	0	0	0	0
1700010D01Rik	0	0	0	0
1700010I02Rik	0	0	0	0
1700010I14Rik	1.44376	0.915446	0.352575	0.161076
1700010J16Rik	0	0	0	0
1700010K23Rik	0	0	0	0
1700010M22Rik	0	0	0	0
1700011A15Rik	0	0	0	0
1700011B04Rik	0	0	0	0
1700011E24Rik	0.031191	0.078177	0	0
1700011F03Rik	0	0	0	0
1700011F14Rik	0	0	0	0
1700011H14Rik	0	0	0	0
1700011I03Rik	0.299445	0.150316	0	0
1700011J10Rik	4.52668	2.0683	1.05976	1.24351
1700011L22Rik	0.032727	0	0	0
1700011M02Rik	0	0	0	0
1700012A03Rik	0	0	0	0
1700012A16Rik	0.378968	0.193062	0.270612	0
1700012B07Rik	0.097136	0	0	0
1700012B09Rik	0	0	0	0
1700012B15Rik	13.6413	7.53097	10.4454	10.3017
1700012D01Rik	0.484684	0	0.798084	0.130687
1700012D14Rik	0.427618	0.541508	0	0
1700012I11Rik	0	0	0	0
1700012L04Rik	0.129767	0	0.018347	0
1700012P22Rik	0	0	0	0
1700013D24Rik	0	0	0	0
1700013F07Rik	0.400791	0	0	0
1700013G23Rik	0.639864	0.437307	0	0
1700013G24Rik	0	0	0	0
1700013H16Rik	0.21372	0	0	0
1700013N18Rik	0	0	0	0
1700014N06Rik	0	0	0	0
1700015E13Rik	0.01723	0	0	0
1700015F17Rik	0	0	0	0
1700015G11Rik	0	0	0	0
1700016C15Rik	0	0	0	0
1700016D06Rik	0	0	0	0
1700016G22Rik	0.146406	0	0	0
1700016H13Rik	0	0	0	0
1700016K19Rik	0.285982	0.188384	0	0
1700016L04Rik	0	0	0	0
1700016L21Rik	0	0	0	0
1700016M24Rik	0	0	0	0
1700016P04Rik	0	0	0	0
1700017B05Rik	55.4513	102.216	10.9731	5.10586
1700017D01Rik	0	0	0	0
1700017G19Rik	0	0	0	0
1700017J07Rik	0	0	0.43164	0
1700017N19Rik	0	0	0	0
1700018A04Rik	0.696264	0	0	0
1700018B08Rik	0	0	0	0
1700018B24Rik	0	0	0	0
1700018C11Rik	0	0	0	0
1700018F24Rik	0	0	0	0
1700018G05Rik	0	0	0	0
1700018L02Rik	0.7476	0.197694	0.48439	0.061109
1700018L24Rik	0	0	0	0
1700019A02Rik	0	0	0	0
1700019B03Rik	0	0	0	0
1700019B21Rik	0	0	0	0
1700019D03Rik	0.35092	0.138228	0	0
1700019E08Rik	0	0	0	0
1700019E19Rik	8.60552	1.94114	4.33515	1.46999
1700019G17Rik	2.41487	1.66271	0.296208	0
1700019G24Rik	0	0	0	0
1700019L03Rik	0.189875	0.069055	0.073112	0.075342
1700019M22Rik	0	0	0	0
1700019N12Rik	0.058722	0.098391	0	0
1700019N19Rik	0	0	0	0
1700019O17Rik	0	0	0	0
1700020A23Rik	0	0	0	0
1700020D05Rik	0.544727	0.214158	0.28807	0.049855
1700020G17Rik	0	0	0	0
1700020I14Rik	7.18491	2.66381	1.61636	0.741158
1700020L24Rik	0.865784	1.44036	0.538152	1.04256
1700020M21Rik	0	0	0	0
1700020N01Rik	0.638773	0	0	0
1700020N15Rik	0	0	0	0
1700020N18Rik	0	0	0	0
1700020O03Rik	8.56016	15.8492	3.11928	0.91365
1700021C14Rik	1.76805	0.284465	0.811254	0
1700021F05Rik	10.1758	2.6109	6.89392	1.98174
1700021F07Rik	0	0	0	0
1700021K19Rik	9.24975	19.2841	5.99479	2.08761
1700021N21Rik	0.087493	0	0	0
1700022A21Rik	0	0	0	0
1700022A22Rik	0	0	0	0
1700022E09Rik	0	0	0	0
1700022H16Rik	0	0	0	0
1700022I11Rik	0.014897	0	0	0
1700022P22Rik	0.213353	0	0	0
1700023A16Rik	0	0	0	0
1700023C21Rik	0	0	0	0
1700023E05Rik	0.018995	0	0	0
1700023F02Rik	0	0	0	0
1700023F06Rik	0	0	0	0
1700023L04Rik	0.143693	0	0	0
1700024B18Rik	0	0	0	0
1700024F13Rik	0.046854	0.171744	0	0
1700024G13Rik	0	0	0	0
1700024P03Rik	0	0	0	0
1700024P04Rik	0	0	0	0
1700024P16Rik	0.020824	0	0.017501	0
1700025B11Rik	0	0	0	0
1700025C18Rik	0	0	0	0
1700025E21Rik	0	0	0	0
1700025F22Rik	0	0	0	0
1700025F24Rik	0	0	0	0
1700025G04Rik	1.53498	1.62382	0.503659	0.143015
1700025K23Rik	1.07795	0	0.897068	0
1700025K24Rik	0	0	0	0
1700025M24Rik	0	0	0	0
1700025N23Rik	0.115954	0.219876	0	0
1700026D08Rik	0.075699	0	0	0
1700026D11Rik	0	0	0	0
1700026F02Rik	0	0	0	0
1700026J04Rik	0.756362	0.158087	0.088191	0
1700026L06Rik	7.17459	0.814213	9.78734	6.49276
1700027A15Rik	0	0	0	0
1700027A23Rik	0.596934	0	0	0
1700027D21Rik	0	0	0	0
1700027F09Rik	0.028323	0.266216	0	0
1700027H10Rik	0	0	0	0
1700027I24Rik	0	0	0	0
1700027J07Rik	0	0.106348	0	0
1700028B04Rik	0	0	0	0
1700028D13Rik	0	0	0	0
1700028E10Rik	0.315615	0.199491	0.030561	0
1700028I16Rik	0	0	0	0
1700028J19Rik	0.514853	0	0.371648	0.485374
1700028K03Rik	0.34241	0.117187	0.047004	0
1700028M03Rik	0	0	0	0
1700028P14Rik	0.235357	0	0	0
1700028P15Rik	0	0	0	0
1700029B22Rik	0	0	0	0
1700029F09Rik	19.2226	5.21127	8.43703	1.36573
1700029F12Rik	0	0	0	0
1700029G01Rik	0.998957	2.4873	1.6331	0.82384
1700029H14Rik	0	0.017313	0	0
1700029I01Rik	1.86628	2.08608	0.440678	0
1700029I15Rik	0.826028	0.764233	1.29109	0
1700029J03Rik	0	0	0	0
1700029J07Rik	1.13943	0.722431	0.228302	0
1700029J11Rik	1.01896	0.31011	1.26433	0.177903
1700029M20Rik	0	0	0	0
1700029N11Rik	0	0	0	0
1700029P11Rik	0	0	0	0
1700030A11Rik	0	0	0	0
1700030C10Rik	0.931084	1.18344	1.07045	0.19005
1700030F04Rik	0	0	0	0
1700030F18Rik	0	0	0	0
1700030J22Rik	0.520198	0.894014	0.191308	0
1700030K09Rik	4.10232	6.2649	3.20969	1.06024
1700030L20Rik	0	0	0	0
1700030M09Rik	0	0	0	0
1700030N03Rik	0	0	0	0
1700030O20Rik	0.05356	0	0	0
1700031A10Rik	0	0	0	0
1700031F05Rik	0	0	0	0
1700031M16Rik	0	0	0	0
1700031P21Rik	0	0	0	0
1700034E13Rik	0	0	0	0
1700034F02Rik	0.086483	0.013877	0	0
1700034G24Rik	0	0	0	0
1700034H14Rik	19.0696	7.44031	3.72055	0.785529
1700034H15Rik	0.080693	0.180935	0.110237	0
1700034I23Rik	0.031344	0.043735	0	0
1700034J05Rik	0	0	0	0
1700034K08Rik	0	0	0	0
1700034O15Rik	0	0	0	0
1700034P13Rik	0.04371	0.082397	0.082978	0
1700036G14Rik	0	0	0	0
1700037C18Rik	1.55539	1.79564	1.57179	0.577887
1700037H04Rik	11.5733	12.151	13.6735	11.321
1700039E15Rik	0	0	0	0
1700039E22Rik	0	0	0	0
1700040I03Rik	8.70718	3.74548	7.77115	2.22079
1700040L02Rik	0.500499	0.280293	0	0
1700040N02Rik	0	0	0	0
1700041C23Rik	0	0	0	0
1700041M19Rik	0	0	0	0
1700042B14Rik	0.092554	0	0	0
1700042G07Rik	0	0	0	0
1700042G15Rik	0	0	0.033949	0
1700042O10Rik	0.046775	0.107598	0	0
1700044C05Rik	0	0	0	0
1700044K03Rik	0	0	0	0
1700045H11Rik	0	0	0	0
1700045I19Rik	0.070608	0.291599	0.171904	0.043337
1700046C09Rik	0	0	0	0
1700047G03Rik	0.041659	0.108532	0	0
1700047I17Rik2	0.987265	0.020055	0.494778	0.012018
1700047L14Rik	0	0	0	0
1700047M11Rik	0.846117	0	0.045457	0.250217
1700048M11Rik	0.058119	0	0	0
1700048O20Rik	0.410644	0.180261	0.110471	0
1700049E15Rik	0	0	0	0
1700049E22Rik	0	0	0	0
1700049G17Rik	0.838624	0.408897	0.057864	0.024275
1700049L16Rik	0	0	0	0
1700051A21Rik	0	0	0	0
1700052I22Rik	0	0	0	0
1700052K11Rik	0.476175	0.524411	0.134402	0.030623
1700052N19Rik	6.35869	8.70521	2.81335	0.36772
1700054A03Rik	0	0	0	0
1700054K19Rik	0	0	0	0
1700054M17Rik	0	0	0	0
1700054N08Rik	0.731774	1.83395	0.989496	0.243748
1700054O13Rik	0	0	0	0
1700055C04Rik	0	0	0	0
1700055N04Rik	0.062477	0	0.086032	0
1700056E22Rik	1.39813	0.836906	2.0198	1.57726
1700057G04Rik	0	0	0	0
1700057H15Rik	0	0	0	0
1700057K13Rik	0.027086	0	0	0
1700058G18Rik	0	0	0	0
1700060C16Rik	0	0	0	0
1700060C20Rik	0	0	0	0
1700061F12Rik	0	0	0	0
1700061G19Rik	0.108449	0.071926	0.195071	0
1700061I17Rik	0	0	0	0
1700061J05Rik	0	0	0	0.100662
1700063A18Rik	0	0	0	0
1700063D05Rik	0.04538	0	0	0
1700063O14Rik	0	0	0	0
1700064J06Rik	0	0	0	0
1700064M15Rik	0.043535	0	0	0
1700065D16Rik	0.038943	0.062892	0.076675	0.083333
1700065I16Rik	0	0	0	0
1700065I17Rik	0	0	0	0
1700065J11Rik	0	0	0	0
1700065J18Rik	0	0	0	0
1700065O20Rik	0	0	0	0
1700066B17Rik	0	0	0	0
1700066B19Rik	0.123264	0.046193	0.067956	0
1700066J24Rik	0.384056	0.629649	0.393231	0.438904
1700066M21Rik	2.82032	1.42709	0.462312	0
1700066N21Rik	0	0	0	0
1700066O22Rik	0	0	0	0
1700067G17Rik	0	0	0	0
1700067K01Rik	0.053556	0.312851	0.239414	0
1700067P10Rik	0	0	0	0
1700069L16Rik	0	0	0	0
1700069P05Rik	0	0	0	0
1700071K01Rik	0	0	0	0
1700071M16Rik	0.357849	1.69969	0.385385	0
1700072B07Rik	0	0	0	0
1700072O05Rik	0	0	0	0
1700073E17Rik	0.202058	0.028672	0	0
1700074H08Rik	0	0	0	0
1700074P13Rik	0	0	0	0
1700080E11Rik	0	0	0	0
1700080N15Rik	0	0	0	0
1700080O16Rik	0	0	0	0
1700081H04Rik	0	0	0	0
1700081H22Rik	0	0	0	0
1700081L11Rik	16.7844	29.9821	7.61062	2.53038
1700084C01Rik	0.4315	0.263465	0.043311	0
1700084E18Rik	0.897793	0.266515	0.305611	0.400825
1700084F23Rik	0	0	0	0
1700084J12Rik	0	0	0	0
1700085B03Rik	0	0	0	0
1700085C21Rik	0	0	0	0
1700086L19Rik	0.031216	0	0	0
1700086O06Rik	0.536107	0.256906	1.2992	0.968837
1700088E04Rik	0.306537	0.03138	0.039647	0.027995
1700090G07Rik	0	0	0	0
1700091E21Rik	0	0	0	0
1700092C02Rik	0	0	0	0
1700092C10Rik	0	0	0	0
1700092E19Rik	0	0	0	0
1700092K14Rik	0	0	0	0
1700092M07Rik	0.339593	0.042806	0.631882	0
1700093K21Rik	0	0	0	0
1700094D03Rik	5.67972	2.60884	1.82648	0.353999
1700094J05Rik	0	0	0	0
1700094M24Rik	0.017562	0	0	0
1700095A21Rik	0	0	0	0
1700095B10Rik	0	0	0	0
1700095B22Rik	0	0	0	0
1700096J18Rik	0.479392	0.584904	0	0
1700096K18Rik	1.31072	0.919594	0.667722	0.555115
1700097N02Rik	1.37605	0.480009	0.147616	0.140281
1700100L14Rik	0	0	0	0
1700101E01Rik	0.014454	0.262285	0.155963	0
1700101I11Rik	0.092634	0	0.034821	0
1700101O22Rik	0	0	0	0
1700102H20Rik	0	0	0	0
1700102P08Rik	0.743334	1.73188	1.16364	0
1700104A03Rik	0	0	0	0
1700105P06Rik	0	0	0	0
1700106J16Rik	0	0	0	0
1700106N22Rik	3.57644	1.89698	1.69983	0.10805
1700108F19Rik	0.068583	0	0	0
1700108J01Rik	0	0	0	0
1700108M19Rik	0	0	0	0
1700109F18Rik	0	0	0	0
1700109G14Rik	0	0	0	0
1700109G15Rik	0	0	0	0
1700109H08Rik	0.976882	0.500536	0.245881	0
1700109I08Rik	0	0	0	0
1700110C19Rik	0.303075	0.351407	0.145881	0
1700110I01Rik	0	0.240216	0	0
1700110K17Rik	0	0	0	0.063463
1700110M21Rik	0	0	0	0
1700111N16Rik	0	0	0	0
1700112E06Rik	0.789707	0.380057	0.90231	0.191797
1700112H15Rik	0	0	0	0
1700113A16Rik	65.5843	28.9934	26.7974	8.51221
1700113H08Rik	0.042952	0	0.046439	0
1700113I22Rik	0.275641	0.147261	0.457832	0
1700119H24Rik	0	0	0	0
1700120C14Rik	0.329823	0	0.498626	0
1700120E14Rik	0	0	0	0
1700120G07Rik	0	0	0	0
1700120K04Rik	0.58809	0.781059	0.395492	0.176484
1700121L16Rik	0	0	0	0
1700121N20Rik	0	0	0	0
1700122O11Rik	0	0	0	0
1700123I01Rik	0.106106	0	0.590681	0.193744
1700123K08Rik	0	0	0	0
1700123L14Rik	0	0	0	0
1700123M08Rik	0.341787	0.245948	0	0.266082
1700123O12Rik	0	0	0	0
1700123O20Rik	18.1978	13.0644	9.55568	2.89001
1700123O21Rik	0	0	0	0
1700125D06Rik	0.092064	0	0	0
1700125G02Rik	0	0	0	0
1700125G22Rik	0	0	0	0
1700125H03Rik	0.158442	0	0	0
1700125H20Rik	0	0	0	0
1700126H18Rik	0	0	0	0
1700128A07Rik	0	0	0	0
1700128F08Rik	0	0	0	0
1700129C05Rik	0	0	0	0
1810006J02Rik	0.19795	0	0	0
1810006K21Rik	115.966	24.6998	55.1002	37.8095
1810007C17Rik	0	0	0	0
1810007D17Rik	0	0	0	0
1810007I06Rik	0	0	0	0
1810008A18Rik	14.8946	26.4892	11.4819	7.67743
1810008I18Rik	0.296117	0.334783	0	0.167089
1810009A15Rik	31.6271	15.0581	19.0963	11.0427
1810009J06Rik	0	0	0	0
1810010D01Rik	0.07869	0	0.093385	0
1810010H24Rik	0.447288	0.204883	0.091466	0
1810011H11Rik	42.9574	28.2463	48.2861	15.8729
1810011O10Rik	13.3197	5.79294	6.2138	1.97838
1810012K16Rik	0	0	0	0
1810012P15Rik	1.13728	1.12265	0.283429	0.177274
1810013A23Rik	0	0	0	0
1810013D10Rik	39.0205	18.3462	28.987	10.4716
1810013L24Rik	13.4383	10.602	5.6191	1.35571
1810014B01Rik	1.66399	0.728516	0.517933	0
1810014F10Rik	10.2756	2.61617	10.1961	9.60676
1810018F18Rik	0	0	0	0
1810019D21Rik	0.164382	0	0.088068	0
1810019J16Rik	0.033209	0	0.127014	0.064287
1810020D17Rik	16.959	5.63638	8.70848	2.79816
1810020O05Rik	0.09335	0.173078	0	0
1810021B22Rik	0.725449	0.614898	0.429586	0
1810022K09Rik	25.9233	3.4508	11.0452	3.5511
1810024B03Rik	0.244718	0.091365	0	0
1810026B05Rik	9.51478	0.433046	0.696315	0.023497
1810026J23Rik	7.95559	5.964	2.63413	0.38037
1810027O10Rik	79.168	24.5221	63.4781	69.2148
1810029B16Rik	3.22743	1.74937	1.2613	0.402493
1810030J14Rik	0	0	0	0
1810030N24Rik	11.3573	1.65994	1.76002	0.729868
1810030O07Rik	24.6206	32.7034	11.9087	3.00206
1810031K17Rik	27.1497	39.7799	41.1836	25.706
1810032O08Rik	12.483	7.47629	17.3408	11.2242
1810033B17Rik	10.5967	15.3708	4.72789	4.52123
1810034E14Rik	1.24254	1.3007	1.2462	1.01875
1810035I16Rik	0	0	0	0
1810035L17Rik	58.516	10.9475	57.6734	46.8439
1810037I17Rik	66.257	17.2988	22.2828	22.0862
1810041L15Rik	0.13505	0.031864	0.021011	0
1810043G02Rik	10.3606	11.7543	6.70249	4.73794
1810043H04Rik	20.1446	7.98174	12.5076	23.2035
1810044D09Rik	3.07928	1.02102	1.46936	1.50698
1810046J19Rik	58.3506	17.0698	57.0192	44.3843
1810046K07Rik	0.517062	0.146852	0.133006	0.175203
1810048J11Rik	1.68424	1.74321	0.723577	0.175539
1810049H13Rik	8.25172	5.36212	8.6057	4.72335
1810053B23Rik	0	0	0	0
1810055G02Rik	2.9169	3.92176	1.62867	2.24639
1810058I24Rik	39.0832	14.4814	26.1724	20.0813
1810062G17Rik	0.100117	0	0.084435	0.37937
1810062O18Rik	1.25505	0	0.64333	0
1810063B05Rik	18.097	5.8708	11.5411	4.51091
1810063B07Rik	8.76872	4.67791	4.43169	2.12994
1810064F22Rik	0	0	0	0
1810065E05Rik	0.163787	0	0	0
1810074P20Rik	9.49139	7.93357	2.12141	0.210898
2010001E11Rik	0	0	0	0
2010001M06Rik	4.71417	1.60146	9.91369	16.8125
2010001M09Rik	8.81058	14.4176	13.9335	5.80267
2010002M12Rik	0.201343	0.569573	0.14432	0
2010002N04Rik	10.4802	12.7097	1.71725	1.34973
2010003K11Rik	0.027979	0	0	0
2010003K15Rik	0.237701	0	0	0
2010003O02Rik	19.3488	6.23419	19.5131	11.2664
2010005H15Rik	0	0	0	0
2010009K17Rik	0	0	0	0
2010010A06Rik	0	0	0	0
2010011I20Rik	5.00024	7.21246	2.12321	0.474432
2010012O05Rik	5.54349	2.17692	1.93647	0.901667
2010015L04Rik	5.514	6.15547	0.609116	0
2010016I18Rik	0.781245	0.178426	0.698309	0.501458
2010106C02Rik	0.295869	0.176054	0	0
2010106E10Rik	0	0	0	0
2010106G01Rik	14.1032	7.6337	3.34526	0.811592
2010107E04Rik	121.638	22.6381	60.1779	72.372
2010107G12Rik	0.062136	0	0.141078	0
2010107G23Rik	0.157945	0	0.054045	0
2010107H07Rik	27.4403	5.01896	15.0048	19.6528
2010109A12Rik	0.304073	0	0.083553	0
2010109I03Rik	0.836794	0.722897	0.45831	0
2010109K11Rik	5.07438	2.79987	1.21143	0.377823
2010110P09Rik	1.51119	1.93737	10.5814	4.01821
2010111I01Rik	3.1437	3.4308	1.24862	0.386543
2010204K13Rik	1.08945	0	0.367964	0
2010300C02Rik	0.339502	0.304752	0.063545	0.112785
2010305A19Rik	3.71315	3.71952	2.87662	1.11096
2010308F09Rik	0	0	0	0
2010310C07Rik	0	0	0	0
2010315B03Rik	2.51625	2.73824	1.24122	0.403818
2010317E24Rik	0.394344	0.597425	0.38924	0.709794
2010320M18Rik	4.90738	2.77292	5.57374	5.51257
2010321M09Rik	19.1151	36.5059	7.80099	2.1546
2200002D01Rik	1.5056	0.439766	0.66304	1.22974
2200002J24Rik	0	0.189619	0	0
2200002K05Rik	0.154717	0.169118	0.044548	0
2210009G21Rik	0.607155	1.69131	0.485786	0.10272
2210010C04Rik	0.040548	0	0.035451	0
2210010C17Rik	0.339783	0.239769	0.142617	0
2210012G02Rik	4.72198	4.36201	4.36079	1.68105
2210013O21Rik	30.5408	7.6765	18.3243	9.08248
2210015D19Rik	4.77124	2.78218	2.99315	1.4675
2210016F16Rik	18.3298	14.6353	18.4685	9.5385
2210016L21Rik	19.3069	16.4962	16.2382	7.97545
2210018M11Rik	10.3982	19.2962	4.82683	1.74077
2210019I11Rik	0	0	0	0
2210020M01Rik	2.73239	1.12707	0.604033	0.506053
2210021J22Rik	21.8772	10.1995	13.0534	8.14555
2210039B01Rik	0	0	0	0
2210403K04Rik	2.74255	9.18661	4.71665	2.07605
2210404J11Rik	13.3913	12.7995	6.60631	1.0811
2210404O07Rik	7.70615	6.66514	14.6358	8.91743
2210404O09Rik	0.732821	1.39665	0.514497	0
2210407C18Rik	0	0	0	0
2210408F21Rik	3.0398	1.10294	2.61623	0.857193
2210408I21Rik	1.03048	0.292168	0.059974	0.04665
2210409D07Rik	0.071292	0	0	0
2210409E12Rik	0.048501	0	0	0
2210411K11Rik	1.66831	0.677423	0.523389	0.565392
2210414B05Rik	0.280689	0.144427	0	0
2210415F13Rik	0.025768	0	0	0
2210416O15Rik	0.007457	0	0	0
2210417A02Rik	0.405671	0	0	0
2210417K05Rik	0.645607	0	0	0.23838
2210420H20Rik	0	0	0	0
2300002M23Rik	0	0	0	0
2300003K06Rik	0	0	0	0
2300005B03Rik	0	0	0	0
2300009A05Rik	8.82831	1.1541	4.46307	3.10657
2310001A20Rik	18.3335	16.4838	5.43908	1.56423
2310001H17Rik	6.50027	1.28057	2.57316	1.31077
2310001H18Rik	0	0	0	0
2310001K24Rik	0	0	0	0
2310002D06Rik	0	0	0	0
2310002J15Rik	0	0	0	0
2310002L09Rik	0	0	0	0
2310002L13Rik	0	0	0	0
2310003C23Rik	20.1883	14.6585	9.23681	2.88926
2310003F16Rik	62.8616	18.7698	27.2626	21.9533
2310003H01Rik	6.67426	21.729	4.1543	3.82541
2310003L22Rik	2.755	1.66233	1.87993	0.385567
2310004I24Rik	15.7233	10.6686	6.37739	1.33025
2310004N24Rik	34.8162	22.0878	57.3318	23.3287
2310005A03Rik	0	0	0	0
2310005E17Rik	0	0	0	0
2310005G13Rik	0	0	0	0
2310007B03Rik	0	0	0	0
2310007L24Rik	0.149573	0	0.171531	0
2310008H04Rik	6.53534	11.5284	2.14946	0.605087
2310008H09Rik	9.85523	6.88474	3.07084	0.798164
2310008N11Rik	0	0	0	0
2310009A05Rik	19.4237	4.07501	6.73536	2.00254
2310009B15Rik	9.30237	1.85487	4.59984	2.45948
2310010J17Rik	2.39679	0.900746	0.93837	0.303625
2310010M20Rik	0	0	0	0
2310011J03Rik	20.583	19.6767	23.272	18.1382
2310014F07Rik	1.42934	0.491682	0.467432	0
2310014L17Rik	0.115895	0.404486	0.067136	0
2310015A10Rik	1.04237	1.03389	0.299974	0.079278
2310015B20Rik	0.206376	0	0	0
2310015D24Rik	0	0.039653	0	0
2310016D03Rik	0	0	0	0
2310016M24Rik	122.204	31.1887	70.0472	76.2491
2310020H05Rik	0	0	0	0
2310021P13Rik	7.11701	10.6762	9.70578	6.51839
2310022A10Rik	3.54256	5.25953	3.38088	1.71474
2310022B05Rik	11.9989	9.03807	2.71919	1.19567
2310028H24Rik	1.16024	1.55502	2.91877	1.07594
2310030A07Rik	0	0	0	0
2310030G06Rik	0.235948	0.096855	0	0
2310030N02Rik	6.7337	2.69213	2.54942	0.492382
2310033E01Rik	0	0	0.120042	0
2310033P09Rik	19.1007	13.4167	9.51654	9.69258
2310034C09Rik	0	0	0	0
2310034G01Rik	0.66201	0.066543	0.663777	0.579247
2310034O05Rik	0	0	0	0
2310035C23Rik	7.38798	4.17467	1.11098	0.280086
2310035K24Rik	11.0639	14.5715	27.4462	14.173
2310036O22Rik	123.035	47.7518	117.182	86.6471
2310037I24Rik	19.2501	34.5463	9.04275	3.68373
2310039H08Rik	14.4151	3.1972	6.00654	6.68306
2310039L15Rik	0.047586	0	0.155158	0
2310040G24Rik	10.5641	2.33653	4.96795	4.13566
2310042D19Rik	0.425607	1.33685	0.657106	0.236006
2310042E22Rik	0	0	0.018308	0.089482
2310043J07Rik	0	0	0	0
2310043L19Rik	0	0	0	0
2310043O21Rik	0	0	0	0
2310044G17Rik	3.39914	9.08331	2.26481	0.419806
2310044H10Rik	53.3203	40.6995	34.6194	34.3021
2310045N01Rik	32.9614	11.9137	15.9535	14.2213
2310046A06Rik	0	0	0	0
2310046O06Rik	16.0397	15.9533	5.73518	1.7429
2310047B19Rik	1.43665	0.725586	1.00668	0.489313
2310047M10Rik	13.2009	20.6002	17.2258	13.1893
2310050B05Rik	0.199595	0	0	0
2310050C09Rik	0	0	0	0
2310057J18Rik	0	0	0	0
2310057M21Rik	3.84612	2.91398	1.13279	0.330627
2310057N15Rik	0	0	0	0
2310061C15Rik	11.0624	3.03025	4.83962	2.40352
2310061I04Rik	15.0009	11.2966	10.5094	7.29655
2310061J03Rik	4.02139	2.23509	2.49409	3.20377
2310061N02Rik	0	0	0	0
2310065F04Rik	0	0	0	0
2310067B10Rik	2.54389	4.48453	2.2397	2.05535
2310068J16Rik	0.043891	0.306452	0.193612	0.088577
2310069B03Rik	0.034417	0	0	0
2310069G16Rik	0	0	0	0
2310079F23Rik	2.16535	3.39692	0.842171	0.325261
2310079G19Rik	0	0	0	0
2310081J21Rik	0	0	0	0
2400001E08Rik	92.9112	65.1945	131.147	79.7764
2400003C14Rik	59.6069	76.4898	43.6361	11.4701
2400009B08Rik	2.12512	1.39533	0.52619	0.995859
2410001C21Rik	75.5009	91.6813	43.5813	16.1821
2410002F23Rik	6.06683	8.56435	3.76305	1.5456
2410002I01Rik	5.3262	14.0863	4.03508	2.74085
2410002O22Rik	6.94696	8.10165	2.34821	0.725877
2410003K15Rik	18.8325	7.67033	13.002	7.34205
2410003L11Rik	0.573715	0.792223	0.539479	0
2410004A20Rik	0.565293	0.520024	0.158256	0.171202
2410004B18Rik	16.9271	8.00816	6.15552	2.97193
2410004I01Rik	0	0	0	0
2410004N09Rik	16.2247	7.13483	21.8614	22.5159
2410004P03Rik	0.293321	0.359826	0.147999	0.053512
2410006H16Rik	229.637	50.9559	141.99	169.768
2410007B07Rik	0.070729	0	0	0
2410012E07Rik	0	0	0	0
2410012M07Rik	0	0	0	0
2410015M20Rik	40.7517	16.6492	30.2889	32.2934
2410016O06Rik	4.16704	2.28032	1.13534	0.525946
2410017I17Rik	0	0	0.045094	0
2410017P09Rik	4.17508	2.00047	2.36555	1.6826
2410018L13Rik	0.140381	0	0.117062	0
2410018M08Rik	30.536	10.3371	18.2798	39.4671
2410021H03Rik	0	0	0	0
2410022L05Rik	13.0821	3.8378	9.42746	5.15101
2410042D21Rik	3.05371	1.49209	0.46215	0.050194
2410057H14Rik	0	0	0	0
2410066E13Rik	0.877074	0.758717	0.169475	0
2410075B13Rik	3.13342	1.57146	1.77983	0.602005
2410076I21Rik	1.49477	1.19778	1.5327	0.425397
2410088K16Rik	0	0	0	0
2410089E03Rik	1.47925	1.62895	0.564329	0.209471
2410091C18Rik	15.8909	7.59241	2.26052	0.282957
2410114N07Rik	0	0	0	0
2410124H12Rik	0	0	0	0
2410127L17Rik	3.81584	0.288525	0.483443	0
2410131K14Rik	3.68425	7.50757	2.33524	0.84958
2410137F16Rik	0	0	0	0
2410137M14Rik	0	0	0	0
2410141K09Rik	0	0	0	0
2500003M10Rik	27.5012	21.9805	12.814	5.09566
2500004C02Rik	1.67341	0.59666	0.31475	0.184117
2510002D24Rik	18.6339	8.42956	11.081	3.44252
2510003D18Rik	0	0	0	0
2510003E04Rik	6.85463	5.24794	2.57838	0.60018
2510006D16Rik	65.1832	80.3284	64.4764	46.9552
2510009E07Rik	10.0711	14.6146	7.63495	2.23368
2510012J08Rik	6.54768	8.41626	4.04221	3.11309
2510039O18Rik	17.5134	22.3962	15.5068	11.8439
2510049J12Rik	0.040209	0	0.118643	0
2600006L11Rik	0.093319	0	0.591439	0
2610001J05Rik	7.88974	3.41807	6.88004	1.87244
2610002D18Rik	0.15066	0.182154	0.322151	0
2610002I17Rik	3.76419	3.60378	2.55383	0.850837
2610002J02Rik	25.4168	14.832	18.2253	6.95009
2610002M06Rik	3.98809	1.54501	1.34957	0.23661
2610005L07Rik	3.45048	2.16321	0.725119	0.240863
2610008E11Rik	3.33169	2.42021	0.529783	0.054603
2610015P09Rik	3.36999	2.5778	1.80977	0.30003
2610016A17Rik	0	0	0	0
2610017I09Rik	0.585257	0	0	0.211463
2610018G03Rik	0.701338	0.853119	0.178623	0.057643
2610019E17Rik	3.75733	2.83615	0.935866	0.92106
2610019F03Rik	19.7294	10.2374	1.7808	0.254231
2610020C07Rik	0.54191	0.658097	0.028928	0
2610020H08Rik	2.42478	3.62296	0.779849	0.156015
2610021K21Rik	0.269519	0.508177	0.180762	0
2610027L16Rik	9.67278	21.3939	15.4145	7.36812
2610028E06Rik	0	0	0	0
2610028H24Rik	0.01852	0	0	0
2610029G23Rik	8.4277	4.57886	5.36145	1.66921
2610029I01Rik	4.46547	5.13009	5.12621	0.64653
2610034B18Rik	3.15605	2.14723	0.434583	0.052866
2610034M16Rik	0.05614	0	0	0
2610035D17Rik	7.96872	2.98641	2.12347	0
2610035F20Rik	0.081143	0	0	0
2610037D02Rik	0	0	0	0
2610039C10Rik	12.3441	8.89662	5.72119	1.92076
2610044O15Rik	4.2794	2.23648	0.840632	0
2610100L16Rik	0.037051	0	0	0
2610101N10Rik	3.91407	6.37036	1.74995	0.272043
2610109H07Rik	0.02407	0.11202	0.026067	0
2610203C20Rik	0.168745	0.104123	0	0
2610203C22Rik	5.62423	5.16081	1.50408	0.114068
2610204G22Rik	0.63999	0.353396	0.063374	0
2610206C17Rik	0	0	0	0
2610301B20Rik	6.37962	2.20231	0.600806	0.109026
2610301G19Rik	11.2745	17.826	7.16667	2.27831
2610305D13Rik	0.318739	0.045165	0.04351	0.042679
2610306M01Rik	3.2319	0.627186	0.893493	0.694167
2610307P16Rik	0.402779	0.075171	0.069682	0
2610316D01Rik	0	0	0	0
2610318N02Rik	1.69723	0.998966	1.05276	0.751333
2610507B11Rik	6.54081	7.39244	2.90236	0.766665
2610507I01Rik	6.05536	6.35656	2.58964	0.658925
2610524H06Rik	7.77856	1.71359	7.72896	1.9459
2610528A11Rik	12.8285	7.56328	1.94129	0.438825
2610528E23Rik	3.00319	2.00994	1.77045	0
2610528J11Rik	0	0	0	0
2700007P21Rik	3.92638	2.64864	1.40812	0
2700023E23Rik	3.04979	0	0.64314	0.166799
2700029M09Rik	23.3004	8.06447	6.32954	2.42701
2700038G22Rik	1.77104	1.43709	0.763847	0.205747
2700046A07Rik	0.484269	0.231733	0	0
2700046G09Rik	0.887489	0.437249	0.352821	0.171206
2700049A03Rik	2.52639	2.31778	0.578827	0.05997
2700050L05Rik	4.29971	4.27293	0.873045	0.043259
2700054A10Rik	0.271873	0.061443	0	0
2700060E02Rik	80.1518	23.9264	53.5386	20.1969
2700062C07Rik	13.2699	7.99362	6.05606	1.25006
2700069I18Rik	0	0	0	0
2700070H01Rik	0	0	0	0
2700078E11Rik	7.38813	9.19412	2.39467	0.697438
2700081L22Rik	0.225327	0	0	0
2700081O15Rik	3.85209	4.07878	0.619815	0.076834
2700086A05Rik	0	0	0	0
2700089E24Rik	10.1662	4.34937	3.17408	0.715709
2700089I24Rik	0	0	0	0
2700090O03Rik	0	0	0	0
2700094K13Rik	60.7795	14.9938	32.6302	32.1793
2700097O09Rik	9.71915	3.06883	3.46062	0.479341
2700099C18Rik	2.73548	1.12825	1.05748	0.090556
2810001G20Rik	4.29556	1.73266	1.06599	0
2810002D19Rik	3.74267	1.39915	0.970443	0.332924
2810002N01Rik	22.6151	7.42246	7.82522	2.48009
2810004N23Rik	9.56796	5.89749	6.87412	2.37866
2810006K23Rik	5.66043	4.10465	3.99232	1.38093
2810007J24Rik	2.23058	0.223039	0.154055	0
2810008D09Rik	7.20349	2.53698	4.70043	0.42848
2810008M24Rik	28.1769	14.8291	5.69517	2.18674
2810011L19Rik	0.027127	0	0	0
2810013P06Rik	6.82109	3.45425	1.94935	0.780162
2810021B07Rik	8.9789	3.18808	2.73753	1.32858
2810021J22Rik	1.64514	1.5461	0.394493	0.084022
2810025M15Rik	49.1099	18.0599	24.9963	12.5631
2810029C07Rik	1.09012	0.84452	0.174272	0.084693
2810030E01Rik	0.11298	0.053022	0	0
2810032G03Rik	0.231607	0.182359	0	0
2810046L04Rik	3.87268	8.22844	2.5244	1.12276
2810047C21Rik1	0.468275	0.723353	0.12879	0
2810049E08Rik	0	0	0	0
2810055F11Rik	1.52208	1.06871	0.410541	0.210165
2810055G20Rik	0.167012	0	0.0382	0
2810403A07Rik	12.9502	19.2317	4.84587	1.55685
2810403D21Rik	0.645884	0	0	0
2810404M03Rik	0	0	0	0
2810405F15Rik	0	0	0	0
2810405K02Rik	11.1587	9.15788	13.9849	9.91302
2810407C02Rik	20.4918	11.4405	4.06637	1.4543
2810408A11Rik	0.47345	0	0.037257	0.068282
2810408I11Rik	2.38972	0.441257	2.0244	0.229946
2810408M09Rik	5.11425	5.23446	2.25876	0.632303
2810410L24Rik	0.276427	0.067441	0	0
2810417H13Rik	2.8739	3.02697	2.50711	0.722
2810422J05Rik	44.656	29.9912	48.2525	24.5831
2810422O20Rik	2.40527	1.06015	0.638505	0
2810428I15Rik	32.4247	12.5937	21.2382	26.6978
2810429I04Rik	0.594519	0	0.106611	0
2810432D09Rik	21.2766	13.0428	12.6014	10.5225
2810432L12Rik	2.41824	1.18162	0.15179	0
2810433D01Rik	0.04471	0	0	0
2810442I21Rik	0.126221	0.23278	0.051426	0
2810442N19Rik	0.035174	0	0	0
2810453I06Rik	11.1259	12.1673	5.38983	1.13399
2810454H06Rik	0.651645	0.205813	0.201048	0.153945
2810459M11Rik	0.095671	0.133574	0.037447	0
2810468N07Rik	1.9662	0.832281	0.064206	0
2810471M01Rik	0	0	0	0
2810474O19Rik	7.79274	9.14916	4.76995	2.1576
2900002K06Rik	1.30515	0.175416	0.580676	0.137451
2900005J15Rik	0.44815	0.539365	0.123529	0
2900006K08Rik	0.147362	0	0.014144	0
2900008C10Rik	2.40181	1.5927	1.09559	0.540505
2900009J06Rik	0.132764	0	0	0
2900010M23Rik	46.0186	11.676	18.6303	16.9925
2900011O08Rik	0.905648	0.651111	0	0
2900026A02Rik	6.34145	5.43606	0.591466	0.343462
2900041M22Rik	0.380206	0	0.131479	0
2900052N01Rik	0.647319	0.128515	0.037849	0
2900053A13Rik	8.64591	2.17137	6.0821	6.7288
2900055J20Rik	0	0	0	0
2900056M20Rik	1.19839	0.496767	0.085522	0.027141
2900057B20Rik	0	0	0	0
2900060B14Rik	4.55609	1.49961	1.89784	0.878028
2900064A13Rik	84.8427	33.1025	34.1362	14.5865
2900076A07Rik	1.187	0.236121	0.34346	0.158181
2900079G21Rik	0	0	0	0
2900092C05Rik	0	0	0	0
2900092D14Rik	0.027123	0	0	0
2900092E17Rik	31.9522	33.5644	23.6667	15.7856
2900093L17Rik	0.100446	0	0	0
2900097C17Rik	33.9299	35.133	15.8518	4.90295
3000002C10Rik	1.92222	1.68267	1.07492	1.31407
3010001F23Rik	0.028044	0	0	0
3010026O09Rik	7.59665	7.92356	6.24931	1.92195
3100003L05Rik	0	0	0	0
3110001D03Rik	74.4138	22.4751	57.028	46.1328
3110001I22Rik	6.6279	5.19488	3.946	0.998524
3110002H16Rik	28.4597	31.4946	16.5149	5.79023
3110003A17Rik	27.6097	8.08539	15.9902	16.1788
3110007F17Rik	0.53728	0.450377	0	0
3110009E18Rik	2.15662	0.887529	0.42572	0
3110009F21Rik	0	0	0	0
3110015C05Rik	0	0	0	0
3110021A11Rik	0.135256	0	0.110001	0
3110021N24Rik	0.01802	0	0	0
3110035E14Rik	0.392632	0.236626	0.019569	0
3110039I08Rik	0	0	0	0
3110039M20Rik	0	0	0	0
3110040N11Rik	8.0987	4.22968	4.82118	1.51655
3110043O21Rik	10.3435	21.672	6.51798	0.790905
3110045C21Rik	0.236472	0	0	0
3110047P20Rik	0.003825	0	0	0
3110052M02Rik	1.74831	1.13656	0.329086	0.042578
3110056K07Rik	5.10071	1.30425	1.87719	0.259707
3110056O03Rik	5.03384	9.12037	5.25941	5.50733
3110057O12Rik	1.47819	0.93279	0.306499	0
3110062M04Rik	1.4961	11.3858	4.68943	0.326201
3110070M22Rik	0.585442	0.205085	0.420576	0
3110079O15Rik	0	0	0	0
3110082D06Rik	0.027202	0	0	0
3110082I17Rik	11.1603	18.19	17.8958	10.7742
3110082J24Rik	0.166586	0	0	0
3110099E03Rik	0	0	0	0
3200001D21Rik	0.226278	0.067737	0.045257	0
3200002M19Rik	28.3311	15.7997	81.0865	33.1608
3230401D17Rik	44.5721	27.3773	32.8277	9.78541
3300002I08Rik	1.05317	0.579529	0.448668	0
3300005D01Rik	1.52167	0.227994	2.14362	0.563014
3425401B19Rik	0.011302	0.03107	0	0
3632451O06Rik	0	0.10579	0	0
3632454L22Rik	0	0	0	0
3830403N18Rik	2.23551	0.616138	0.213599	0
3830406C13Rik	7.68811	4.8711	2.30561	0.622663
3830408C21Rik	0.298175	0.582249	0.182042	0
3830417A13Rik	0	0	0	0
3830431G21Rik	0	0	0	0
3930402G23Rik	0.00952	0	0	0
4430402I18Rik	0.429437	0.161068	0	0
4632411B12Rik	12.9587	28.3895	10.9712	5.00775
4632415K11Rik	2.34623	5.05919	1.27352	0.318326
4632415L05Rik	2.7451	1.65348	0.643838	0.293745
4632427E13Rik	1.84261	1.90474	0.398071	0.170858
4632428C04Rik	0.390483	0.129737	0.442127	0.208916
4632428N05Rik	260.231	326.042	57.4421	25.9627
4632434I11Rik	0.865849	1.12974	0.392939	0.06115
4732415M23Rik	0.138465	0	0	0
4732416N19Rik	0.090278	0	0	0
4732418C07Rik	15.753	14.8066	4.3798	0.952608
4732456N10Rik	0	0	0	0
4732471D19Rik	3.41592	5.29711	0.931675	0.024089
4732471J01Rik	0.172402	0.037576	0.078268	0
4732490B19Rik	0	0	0	0
4732491K20Rik	0.474652	0.17225	0.129097	0
4831426I19Rik	0.050848	0.234556	0.068035	0
4831440E17Rik	0.078307	0.10857	0.031559	0.024028
4832428D23Rik	0	0	0	0
4833403I15Rik	0	0.035933	0	0
4833412C05Rik	0.14753	0.168037	0	0
4833417C18Rik	0.451693	0.087693	0.118525	0.28303
4833418N02Rik	0.798186	0.409751	0.523534	0.090807
4833419F23Rik	2.84648	1.09431	2.91591	0.794625
4833420G17Rik	31.8752	27.4693	10.8013	1.60912
4833422C13Rik	0.079144	0.09308	0	0
4833423E24Rik	0	0	0	0
4833424O15Rik	0.009797	0	0	0
4833427F10Rik	0.043117	0	0	0.078277
4833427G06Rik	0.227047	0	0	0
4833428L15Rik	0	0	0	0
4833439L19Rik	75.6366	78.1548	19.3328	6.66939
4833442J19Rik	3.15642	0.897508	0.682449	0
4921501E09Rik	0	0	0	0
4921504E06Rik	0.014629	0	0	0
4921506M07Rik	0	0	0	0
4921507L20Rik	0.523046	0.530783	0.112848	0
4921507P07Rik	0.384561	0.287572	0.053086	0
4921508A21Rik	0	0	0	0
4921508D12Rik	0	0	0	0
4921509C19Rik	0	0	0	0
4921509O07Rik	0.025355	0	0	0
4921510H08Rik	0	0	0	0
4921511C10Rik	0.335988	0.391971	0.069119	0
4921511C20Rik	0	0	0	0
4921511H03Rik	0	0	0	0
4921511I17Rik	0	0.258477	0	0
4921511M17Rik	0	0	0	0
4921513D23Rik	1.72996	3.3447	0.751497	0.110825
4921513I03Rik	0.082137	0	0.053665	0
4921515E04Rik	0	0	0	0
4921515J06Rik	0	0.099238	0	0
4921517D21Rik	0	0	0	0
4921517D22Rik	0	0	0	0
4921517L17Rik	0.529605	1.23364	1.16759	0.39015
4921523A10Rik	0.129807	0.197382	0.100347	0
4921524J17Rik	4.53553	2.55702	2.30258	0.357596
4921524L21Rik	0	0	0	0
4921525B02Rik	0	0	0	0
4921525O09Rik	0.110435	0.106052	0.149248	0
4921528I01Rik	0	0	0	0
4921528O07Rik	0	0	0	0
4921530D09Rik	0.029042	0	0	0
4921530L18Rik	0.557254	0.205749	0.224186	0
4921530L21Rik	0	0	0	0
4921531C22Rik	2.10198	1.40906	1.69838	0.376781
4921531P14Rik	0	0	0	0
4921533I20Rik	0	0	0	0
4921536K21Rik	0	0.051156	0	0
4921539E11Rik	0	0	0	0
4922501C03Rik	1.41741	1.71153	0.509257	0.154235
4922501L14Rik	0	0	0	0
4922502D21Rik	0	0	0	0
4922502H24Rik	0	0	0	0
4922502N22Rik	0	0	0	0
4922505E12Rik	0	0	0	0
4922505G16Rik	0.030072	0.044072	0	0.022787
4930401C15Rik	0	0	0	0
4930401O10Rik	0	0	0	0
4930401O12Rik	0.058237	0	0.074159	0
4930402F06Rik	0.011011	0	0	0
4930402F11Rik	0	0	0	0
4930402H24Rik	2.76016	5.54039	1.11745	0.12282
4930403N07Rik	0	0	0	0
4930404A05Rik	0	0	0	0
4930404A10Rik	0	0	0	0
4930404H11Rik	0	0	0	0
4930404H21Rik	0	0	0	0
4930404I05Rik	1.04277	1.63004	0.329269	0
4930404N11Rik	1.83701	3.39378	2.03972	4.13019
4930405A10Rik	0	0	0	0
4930405A21Rik	0.120544	0	0.157538	0.155274
4930405D11Rik	0	0	0	0
4930405J17Rik	0	0	0	0
4930405P13Rik	0.072792	0.518518	0.422186	0.096992
4930406D18Rik	0.05315	0	0	0
4930407I10Rik	0	0	0	0
4930408F14Rik	0	0	0	0
4930412B13Rik	0	0	0	0
4930412C18Rik	0.177422	0.073245	0.087263	0
4930412F15Rik	0	0	0.035376	0
4930412O13Rik	0	0	0.026868	0
4930413E15Rik	0.025311	0	0	0
4930413F20Rik	0.074362	0	0	0
4930413G21Rik	0.210768	0.130353	0.050713	0.19298
4930413M19Rik	0	0	0	0
4930414L22Rik	1.47921	1.18918	0.416279	0.527945
4930414N06Rik	0	0	0	0
4930415F15Rik	0	0	0.082825	0
4930415L06Rik	0	0	0	0
4930415O20Rik	0.02779	0	0	0
4930417G10Rik	0.046102	0	0.044029	0
4930417O13Rik	0.351177	0	0	0
4930417O22Rik	0	0	0.052631	0
4930419G24Rik	0	0	0	0
4930420K17Rik	5.30688	3.54225	2.6617	0.268781
4930422G04Rik	0.346545	0.696145	0.244763	0
4930423M02Rik	0	0	0	0
4930425K10Rik	0	0	0	0
4930425O10Rik	0.185747	0	0	0
4930426L09Rik	0.333694	0.401646	0.059598	0.068374
4930427A07Rik	1.2287	4.25586	1.38429	0.668892
4930428D18Rik	0	0	0	0
4930428E07Rik	0	0	0	0
4930428E23Rik	0	0	0	0
4930428G15Rik	0	0	0.069733	0
4930428O21Rik	0	0.121429	0	0
4930429B21Rik	0.117211	0.049431	0.030064	0
4930429D17Rik	0	0	0	0
4930429F11Rik	0	0	0	0
4930429F24Rik	0.478807	0	0	0
4930430A15Rik	0	0	0	0
4930430D24Rik	0	0	0	0
4930430F08Rik	1.25585	0.870895	0.295208	0
4930430F21Rik	0	0	0	0
4930430J02Rik	0	0	0	0
4930431A04Rik	0.040447	0.17933	0.040912	0
4930431P03Rik	0.041876	0	0.065228	0.050427
4930432J09Rik	0	0	0	0
4930432K09Rik	0	0	0	0
4930432K21Rik	0.499105	1.01391	0.430455	0
4930432M17Rik	0	0	0	0
4930433B08Rik	0	0	0	0
4930433I11Rik	0	0	0	0
4930433N12Rik	0	0	0	0
4930434J06Rik	0	0	0	0
4930435E12Rik	0	0	0	0
4930438E09Rik	0	0	0	0
4930440C22Rik	0	0	0	0
4930441J16Rik	0	0	0	0
4930441O14Rik	0.381979	0.143988	0.123105	0.133405
4930442J19Rik	0	0	0	0
4930442L01Rik	0	0	0	0
4930443G12Rik	0.021159	0	0	0
4930443O20Rik	0.134106	0.160315	0	0
4930444A02Rik	7.96054	15.2337	5.63609	1.59492
4930444F02Rik	0	0	0	0
4930444G20Rik	0.018437	0	0	0
4930444M15Rik	0	0	0	0
4930444P10Rik	0	0	0	0
4930447A16Rik	0	0	0	0
4930447C04Rik	0.03419	0	0	0
4930447J18Rik	0	0	0	0
4930447K03Rik	1.02767	0.587667	0.253576	0.11177
4930447N08Rik	0	0	0	0
4930448C13Rik	0	0	0	0
4930448F12Rik	0	0	0	0
4930448H16Rik	0	0	0	0
4930448I06Rik	0	0	0	0
4930448I18Rik	0	0	0	0
4930448K20Rik	0	0	0	0
4930449E01Rik	0.054329	0	0	0
4930449E18Rik	0	0	0	0
4930449I24Rik	0	0	0	0
4930451C15Rik	0.06839	0	0	0
4930451I11Rik	0	0	0	0
4930452A19Rik	0	0	0	0
4930452B06Rik	0.187075	0.042046	0.022671	0
4930452G13Rik	0	0	0	0
4930452N14Rik	0.02385	0	0	0
4930453H23Rik	0	0	0	0
4930453N24Rik	17.7909	7.16108	6.40893	1.7193
4930455B14Rik	0	0	0	0
4930455C13Rik	0.079324	0.293273	0	0
4930455C21Rik	2.75018	2.49862	2.38971	1.12272
4930455D15Rik	0	0	0	0
4930455F16Rik	0	0	0	0
4930455F23Rik	5.8123	4.30663	2.47222	0.560649
4930455H04Rik	0.018032	0	0.046508	0
4930455J16Rik	0	0	0	0
4930456L15Rik	0	0	0	0
4930458L03Rik	0	0	0	0
4930459L07Rik	0	0	0	0
4930461G14Rik	0	0	0	0
4930465A12Rik	0	0	0	0
4930465K10Rik	0.01285	0	0.017462	0
4930465M20Rik	0	0	0	0
4930467D21Rik	0	0	0	0
4930467E23Rik	0.010921	0	0	0
4930467K11Rik	0.006452	0	0	0
4930468A15Rik	0	0	0	0
4930469G21Rik	0.025669	0	0	0
4930470H14Rik	0	0	0	0
4930470P17Rik	0	0	0	0
4930471C04Rik	0	0	0	0
4930471G03Rik	0	0	0	0
4930471I20Rik	0	0	0	0
4930471M09Rik	0	0	0	0
4930471M23Rik	27.4681	54.3422	28.4966	14.0383
4930473A02Rik	0.535188	0.609272	0.192396	0
4930473A06Rik	0.158508	0.269764	0.113111	0
4930473O22Rik	0	0	0	0
4930474G06Rik	0	0	0	0
4930474H20Rik	0	0	0	0
4930474M22Rik	0	0	0	0
4930474N05Rik	0	0	0	0
4930474N09Rik	0.081097	0	0	0
4930478L05Rik	0.441346	0.2633	0.077406	0
4930478P22Rik	0	0	0	0
4930479D17Rik	0.046109	0	0	0
4930479M11Rik	0	0	0	0
4930480E11Rik	0	0	0	0
4930480G23Rik	0	0	0	0
4930480K15Rik	0	0	0	0
4930480M12Rik	0	0	0	0
4930481A15Rik	8.21588	6.97226	3.7942	0.328942
4930483J18Rik	0.06984	0	0	0
4930483K19Rik	0.249135	0	0.033365	0
4930483O08Rik	0.063401	0	0	0
4930486F22Rik	0	0	0	0
4930486I03Rik	0	0	0	0
4930486L24Rik	4.08545	2.72503	5.0636	0.796914
4930487D11Rik	0	0	0	0
4930487H11Rik	0	0.096005	0	0
4930488B22Rik	0	0	0	0
4930488L21Rik	0.017536	0	0	0
4930500F04Rik	0	0	0	0
4930500J02Rik	0	0	0	0
4930500L23Rik	0	0	0	0
4930502A04Rik	0	0	0	0
4930502E09Rik	0.095	0.192303	0	0
4930502E18Rik	0.173916	0.09615	0	0
4930503B20Rik	0	0	0	0
4930503E14Rik	0	0	0	0
4930503E24Rik	0	0	0	0
4930503H13Rik	0	0	0	0
4930503L19Rik	1.93221	2.61763	0.665811	0.068875
4930503O07Rik	0	0	0	0
4930504O13Rik	0	0	0	0
4930505A04Rik	0	0	0	0
4930505G20Rik	0	0	0	0
4930506M07Rik	2.28914	10.5465	5.50827	1.77012
4930507D05Rik	0.083975	0.100118	0.027953	0.05894
4930509E16Rik	0.136711	0.185819	0.052366	0
4930509J09Rik	0.010844	0	0	0
4930509K18Rik	0	0	0	0
4930511A02Rik	0	0	0	0
4930511E03Rik	0.098621	0	0	0
4930511I11Rik	0	0	0	0
4930511M06Rik	0.024475	0	0.022152	0
4930511M11Rik	0	0	0	0
4930512B01Rik	0.133267	0.055023	0.053228	0
4930513D17Rik	0.017982	0	0	0
4930513N10Rik	0.171736	0.51926	0.171179	0
4930513O06Rik	0	0	0	0
4930515B02Rik	0	0	0	0
4930515G01Rik	0.671476	0.09246	0.20274	0.209813
4930515G16Rik	0.021254	0	0	0
4930515L03Rik	0	0	0	0
4930515L19Rik	0	0	0	0
4930517E11Rik	0	0	0	0
4930518P08Rik	0	0	0	0
4930519D14Rik	0	0	0	0
4930519F09Rik	0	0	0	0.009466
4930519F16Rik	0	0	0	0
4930519F24Rik	0	0	0	0
4930519G04Rik	0	0	0	0
4930519H02Rik	0	0	0	0
4930520O04Rik	0.136826	0	0.028504	0
4930520P13Rik	0	0	0	0
4930521A18Rik	0	0	0	0
4930521E06Rik	0	0	0	0
4930522H14Rik	0	0	0	0
4930522O17Rik	0	0	0	0
4930523C07Rik	17.4558	12.0891	4.28884	0.993353
4930523O13Rik	0	0	0	0
4930524B15Rik	0	0	0	0
4930524C18Rik	0	0	0	0
4930524E20Rik	0	0	0	0
4930524L23Rik	0.299117	0.605002	0.063523	0.093988
4930524N10Rik	0	0	0	0
4930524O05Rik	0	0	0	0
4930524O08Rik	0	0	0	0
4930525D18Rik	0.049046	0	0	0
4930525F21Rik	0	0	0	0
4930525G20Rik	0.046641	0.056795	0	0
4930525M21Rik	0	0	0	0
4930526D03Rik	0	0	0	0
4930526I15Rik	1.76623	1.46626	1.61461	1.91404
4930526L06Rik	0	0	0	0
4930527F14Rik	0	0	0	0
4930527G23Rik	0	0	0	0
4930528A17Rik	0.069851	0.086124	0	0
4930528D03Rik	0	0	0	0
4930528F23Rik	0.072346	0	0.223639	0
4930528P14Rik	0	0	0	0
4930529C04Rik	0.008765	0.054347	0.003768	0
4930529F22Rik	0	0	0	0
4930529F24Rik	0	0	0	0
4930529K09Rik	0	0	0	0
4930529L06Rik	0	0	0	0
4930529M08Rik	0.041764	0.074098	0	0
4930533B01Rik	0.019613	0	0	0
4930533P14Rik	0	0	0	0
4930534B04Rik	1.66212	2.88904	0.642943	0.117973
4930538K18Rik	0.310768	0.038602	0.139332	0
4930539C22Rik	0	0	0	0
4930539E08Rik	0.231608	0.371291	0.022298	0
4930539J05Rik	0.69209	1.92148	1.92315	1.91994
4930539M17Rik	0	0	0	0
4930539N22Rik	0	0	0	0
4930540M03Rik	0	0	0	0
4930542C21Rik	0	0	0	0
4930542D17Rik	0	0	0	0
4930542H20Rik	0	0	0	0
4930543E12Rik	0	0	0	0
4930544D05Rik	0.094988	0.777512	0	0
4930544G11Rik	0	0	0	0
4930544M13Rik	0	0	0	0
4930544O15Rik	0.113363	0.110514	0.266854	0
4930545E07Rik	0	0	0	0
4930545H06Rik	0	0	0	0
4930545L23Rik	0	0	0	0
4930546C10Rik	0	0	0	0
4930546K05Rik	0	0	0	0
4930547C10Rik	0	0	0.025976	0
4930547E08Rik	0	0	0	0
4930547E14Rik	0	0	0	0
4930547N16Rik	0.419176	1.57029	0.450452	0.053041
4930548G14Rik	0	0	0	0
4930548H24Rik	0.057203	0	0	0
4930548J01Rik	0	0	0	0
4930548K13Rik	0	0	0	0
4930549C01Rik	0	0	0	0
4930549G23Rik	0	0	0	0
4930550C14Rik	0.303112	0.187013	0.050418	0
4930550L24Rik	0.05705	0	0	0
4930552N02Rik	0	0	0	0
4930552P12Rik	0.031221	0.717364	0.441319	0.194898
4930553E22Rik	0	0	0	0
4930554C24Rik	0	0	0	0
4930555B11Rik	0	0	0	0
4930555G01Rik	0	0	0	0
4930555I21Rik	0.129581	0.026899	0.059922	0
4930556C24Rik	0	0	0	0
4930556G01Rik	0	0	0	0
4930556J02Rik	0	0	0	0
4930556M19Rik	0.304419	0.11561	0.031168	0
4930556N09Rik	0	0	0	0
4930557A04Rik	0	0	0	0
4930557J02Rik	0.014222	0	0	0
4930558C23Rik	0	0	0	0
4930558G05Rik	0	0	0	0
4930558J18Rik	0.041584	0	0.028616	0
4930558K02Rik	0	0	0	0
4930562C15Rik	0.006405	0.05878	0.017777	0.069062
4930562F07Rik	3.62319	0.605674	0.96483	0
4930563D23Rik	0	0.043176	0	0
4930563E18Rik	0	0	0	0
4930563E22Rik	0.109529	0.045387	0.005648	0.034153
4930563F08Rik	0	0	0	0
4930563M20Rik	0	0	0	0
4930564B18Rik	0	0	0	0
4930564D02Rik	0	0	0	0
4930564G21Rik	0	0	0	0
4930564K09Rik	0	0	0	0
4930565A17	0	0	0	0
4930565D16Rik	0	0	0	0
4930565N06Rik	0.026759	0	0	0
4930567H12Rik	0	0	0	0
4930567H17Rik	0	0	0	0
4930567J20Rik	0	0	0	0
4930567K20Rik	0	0	0	0
4930568D16Rik	0	0	0	0
4930568E12Rik	0	0	0	0
4930568G15Rik	0	0	0	0
4930568K20Rik	0	0	0	0
4930570G19Rik	0	0	0	0
4930571K23Rik	0	0	0	0
4930572J05Rik	1.54759	1.30048	0.261542	1.00768
4930572K03Rik	0	0	0	0
4930572O13Rik	0	0	0	0
4930573O16Rik	0	0	0	0
4930578C19Rik	1.26184	0.555705	0.074091	0
4930578E11Rik	0	0	0	0
4930578I06Rik	0	0	0	0
4930578M01Rik	0	0	0	0
4930578N16Rik	0.589254	0.382983	0.131389	0.066256
4930578N18Rik	0	0	0	0
4930579C15Rik	0.205793	0	0	0
4930579F01Rik	0.030861	0	0	0
4930579G18Rik	0.087956	0.043813	0.014208	0.036327
4930579G22Rik	1.23934	0.368368	0.254899	0
4930579G24Rik	2.79432	2.33783	0.900175	0.205625
4930579K19Rik	0.137182	0	0.029957	0.187754
4930581F22Rik	1.45573	2.02102	2.33883	0.405051
4930583H14Rik	0.133668	0.080943	0	0
4930583K01Rik	0	0	0	0
4930583P06Rik	0	0	0	0
4930584F24Rik	0	0	0	0
4930588N13Rik	0	0	0	0
4930590J08Rik	0.004754	0	0.009795	0
4930590L20Rik	0	0	0	0
4930591A17Rik	0	0	0	0
4930592A05Rik	0.254965	0.060237	0.062413	0
4930592I03Rik	0	0	0	0
4930593A02Rik	0	0	0	0
4930593C16Rik	0	0	0	0
4930594C11Rik	0.165253	0.278218	0.014413	0
4930595M18Rik	0	0	0	0
4930596D02Rik	0.081676	0	0	0
4930596M17Rik	0.046553	0	0	0
4930597G03Rik	0	0	0	0
4930598F16Rik	0	0	0	0
4930599N23Rik	1.112	0.131103	0.547065	0
4931402G19Rik	0.377455	0.307	0.041399	0
4931403E22Rik	0.060172	0	0	0
4931403G20Rik	0.015171	0.023457	0	0
4931406B18Rik	0.008596	0.029136	0	0
4931406C07Rik	4.94063	3.62477	2.34402	0.544896
4931406H21Rik	0.30485	0.460912	0.075925	0
4931406P16Rik	15.4843	11.0555	2.05114	1.05426
4931407G18Rik	0	0	0	0
4931408A02Rik	0.346231	0.214559	0.123454	0.053902
4931408C20Rik	0.249517	0.323777	0.071857	0
4931408D14Rik	0.012735	0	0	0
4931409K22Rik	0	0	0	0
4931414P19Rik	2.99737	5.85677	1.69426	0.598658
4931417E11Rik	0	0	0	0
4931417G12Rik	0.036018	0	0	0
4931419H13Rik	0	0	0	0
4931420L22Rik	0	0	0	0
4931423N10Rik	0	0	0	0
4931428F04Rik	1.07227	1.23914	0.771652	0
4931428L18Rik	0	0	0	0
4931429I11Rik	0.015113	0.037701	0	0
4931429L15Rik	0.011905	0	0	0
4931429P17Rik	0	0	0	0
4931430N09Rik	0	0	0	0
4931431B13Rik	0	0	0	0
4931431C16Rik	1.49924	1.3999	0.759884	0.226168
4931431F19Rik	0.017086	0	0	0
4931440F15Rik	0.284762	0.352467	0.058164	0
4931440J10Rik	0	0	0	0
4931440L10Rik	0	0	0	0
4931440P22Rik	0.510201	0.232289	0.827139	0.665681
4932411E22Rik	0	0	0	0
4932411G14Rik	0	0	0	0
4932411L15	0.029335	0	0	0
4932411N23Rik	0	0	0	0
4932412D23Rik	0	0	0	0
4932412H11Rik	0.110961	0.112132	0.092493	0.038343
4932413F04Rik	0	0	0	0
4932414J04Rik	0	0	0	0
4932414N04Rik	0	0	0	0
4932415G12Rik	2.80942	1.681	0.465356	0
4932415M13Rik	0	0	0	0
4932416H05Rik	0.688314	0.423977	0.442014	0.045891
4932416K20Rik	0	0	0	0
4932418E24Rik	0	0	0	0
4932425I24Rik	0.121056	0.041833	0	0
4932429P05Rik	0	0	0	0
4932435O22Rik	0.009598	0	0	0
4932438A13Rik	2.51543	3.56985	0.563538	0.049867
4932438H23Rik	0.173001	0.164975	0.046474	0
4932441B19Rik	0	0	0	0
4932441J04Rik	0	0	0	0
4932443I19Rik	0	0	0	0
4932702P03Rik	0.033925	0.098829	0	0
4933400A11Rik	0	0	0	0
4933400B14Rik	0	0	0	0
4933400C05Rik	0.220222	0	0	0
4933400C23	0	0	0	0
4933400F21Rik	0.048995	0	0	0.051557
4933400L20Rik	0	0	0	0
4933401B06Rik	0	0	0	0
4933401D09Rik	0	0	0	0
4933401H06Rik	0.035362	0	0	0
4933401P06Rik	0	0	0	0
4933402C06Rik	0	0	0	0
4933402D24Rik	0	0	0	0
4933402E13Rik	0	0	0	0
4933402J07Rik	0	0	0	0
4933402J10Rik	0	0	0	0
4933402J15Rik	0	0	0	0
4933402N03Rik	0	0	0	0
4933402N22Rik	0.148652	0	0	0
4933402P03Rik	0	0	0	0
4933403F05Rik	2.81033	2.64323	0.889178	0.185235
4933403G14Rik	1.63359	1.0567	0.222247	0.069857
4933403O08Rik	0	0	0	0
4933404G15Rik	0	0	0	0
4933404K08Rik	0.035748	0	0	0
4933404M02Rik	0.183078	0.122568	0	0
4933404O12Rik	1.15509	0.77947	0.474852	0.06563
4933405D12Rik	0	0	0	0
4933405E24Rik	0	0	0	0
4933405L10Rik	0	0	0	0
4933405O20Rik	0	0	0	0
4933406C10Rik	0.164841	0	0.038192	0
4933406D12Rik	0	0	0	0
4933406F09Rik	0	0	0	0
4933406G16Rik	0	0	0	0
4933406I18Rik	0.181574	0	0	0
4933406J08Rik	0	0	0	0
4933406J10Rik	0.16154	0	0	0
4933406K04Rik	0	0	0	0
4933406M09Rik	0	0.119371	0.047831	0
4933407C03Rik	20.165	19.9398	26.1192	23.575
4933407E24Rik	0	0	0	0
4933407G14Rik	0	0	0	0
4933407H18Rik	1.066	0.78138	0.530002	0.202145
4933407I05Rik	0	0	0	0
4933407K13Rik	0.889201	0.913521	0.179341	0.085499
4933407L21Rik	0.212084	0	0.225458	0.076328
4933407P14Rik	0	0	0	0
4933408B17Rik	0.061423	0	0.026405	0
4933408J17Rik	0.015352	0	0	0
4933408N05Rik	0	0	0	0
4933409G03Rik	0.006357	0	0	0
4933409K07Rik	0.117309	0.089271	0	0
4933411E08Rik	0	0	0	0
4933411G06Rik	0	0	0	0
4933411G11Rik	0	0	0	0
4933411K16Rik	0.014294	0.082561	0	0
4933411K20Rik	3.89641	4.01943	0.909797	0.121509
4933412E12Rik	5.13499	5.17612	5.13719	1.32048
4933412E24Rik	0	0	0	0
4933412O06Rik	0	0	0	0
4933413G19Rik	0	0	0	0
4933413J09Rik	0.283246	0.182628	0.179905	0.034089
4933413L06Rik	0	0	0	0
4933415F23Rik	0	0	0	0
4933416C03Rik	0	0	0	0
4933416E03Rik	0	0	0	0
4933416I08Rik	0	0	0	0
4933416M06Rik	0	0	0	0
4933416M07Rik	0.089605	0	0	0
4933417A18Rik	0	0	0	0
4933417D19Rik	0.189464	0.329403	0	0
4933417E11Rik	0.016835	0	0	0
4933417G07Rik	0	0	0	0
4933417O13Rik	0.021254	0.075798	0	0
4933421E11Rik	8.4482	1.86556	1.40926	0.177594
4933421I07Rik	0	0	0	0
4933421O10Rik	1.21282	1.23809	0.231759	0.072974
4933422A05Rik	0.105869	0	0	0
4933422H20Rik	0	0	0	0
4933424B01Rik	5.65561	9.91658	2.82411	0.68392
4933424G05Rik	0	0	0	0
4933424G06Rik	0	0	0	0
4933425B07Rik	0	0	0	0
4933425H06Rik	0	0	0	0
4933425L06Rik	0	0	0	0
4933425O20Rik	0.051792	0	0.054939	0
4933426D04Rik	0.614833	0.787812	0.253152	0.09782
4933426M11Rik	17.4117	31.81	14.1428	6.40125
4933427D06Rik	0	0	0	0
4933427D14Rik	2.96724	3.97286	1.41172	0.149787
4933427E11Rik	0.040702	0	0	0
4933427E13Rik	0	0	0	0
4933427G17Rik	0.093001	0.061427	0.066243	0
4933427I22Rik	0	0	0	0
4933428C19Rik	0.018267	0	0	0
4933429K18Rik	0	0	0	0
4933429O19Rik	0.046363	0	0	0
4933430H15Rik	0.04662	0.136361	0.326511	0
4933430H16Rik	0	0	0	0
4933430I17Rik	0.034794	0	0	0
4933430M04Rik	0	0	0	0
4933430N04Rik	0	0	0	0
4933431E20Rik	1.01346	0.388554	0.092892	0
4933431G14Rik	0.198069	0.22959	0	0
4933432B09Rik	0.032398	0.08459	0.006653	0
4933432G23Rik	0	0	0	0
4933432I03Rik	0.336934	0.356214	0.108159	0
4933432I09Rik	0.107685	0	0.04133	0
4933433C11Rik	0.034174	0	0	0
4933433F19Rik	0	0	0	0
4933433G15Rik	0.290599	0.426758	0.298888	0.289732
4933433G19Rik	0.104518	0.285377	0.043495	0
4933433H22Rik	0.089371	0.129716	0.209534	0
4933433P14Rik	10.1657	7.56564	3.73987	1.30535
4933434E20Rik	74.0829	44.8703	35.8464	6.47307
4933434I20Rik	0	0	0	0
4933436C20Rik	0.334747	0.251648	0.03097	0
4933436E23Rik	0	0	0	0
4933436H12Rik	0	0	0	0
4933436I01Rik	0	0	0	0
4933437F05Rik	1.10356	0.654795	0.547557	0.212056
4933438B17Rik	0	0	0	0
4933438K21Rik	0	0	0	0
4933439C10Rik	2.95904	1.556	2.32203	0.785345
4933439F18Rik	5.72986	6.16316	2.82716	0.74086
4933439K11Rik	0.479769	0.128656	0.837533	0
4933440J02Rik	0	0	0	0
4933440M02Rik	0	0	0	0
5031410I06Rik	0	0	0	0
5031414D18Rik	23.1591	25.3782	4.3648	1.25853
5031425E22Rik	2.26244	2.20114	1.53494	0.894284
5031425F14Rik	1.63978	2.84016	6.35105	4.92134
5031426D15Rik	0.004826	0	0.000345	0
5031434C07Rik	0	0	0	0
5031434O11Rik	1.59343	0.216554	0.489384	0
5031439G07Rik	9.92089	13.483	22.7996	18.2094
5033403H07Rik	0.136332	0	0	0
5033404E19Rik	0.316691	0	0	0
5033406O09Rik	2.2678	1.77103	3.63276	0.456092
5033411D12Rik	0.258871	0	0.036176	0
5033414D02Rik	81.0448	33.1259	45.5186	15.0998
5133401N09Rik	17.3155	6.0746	14.9054	7.43002
5330411J11Rik	0.139557	0.237339	0.98306	0.280921
5330413P13Rik	0	0	0	0
5330417C22Rik	0.019634	0	0.026252	0
5330426P16Rik	1.55504	1.78929	0.758032	1.0827
5330434G04Rik	0	0	0	0
5330437I02Rik	0.025594	0	0.023847	0
5330439B14Rik	0	0	0	0
5430401F13Rik	0	0	0	0
5430402E10Rik	0	0	0	0
5430402O13Rik	0.318012	0.339996	0	0
5430403N17	0	0	0	0
5430405G05Rik	0	0	0	0
5430405H02Rik	3.60835	3.13195	2.67963	1.71838
5430407P10Rik	3.13893	2.5247	0.153983	0
5430411K18Rik	3.18395	4.18538	1.84475	0.457402
5430416N02Rik	10.5867	2.56464	1.55155	1.83332
5430416O09Rik	1.85468	1.24849	0.044468	0
5430417L22Rik	5.87918	6.94487	2.69427	0.163244
5430419D17Rik	0	0	0	0
5430421F17Rik	0.052926	0	0	0
5430421N21Rik	0.205505	0.813634	0.182571	0.845733
5430425J12Rik	0	0	0	0
5430427M07Rik	0	0	0	0
5430427O19Rik	4.75828	2.74546	1.45855	0.221183
5430428K19Rik	0	0	0	0
5430434I15Rik	0	0	0	0
5430435G22Rik	11.5993	18.6601	42.6404	20.191
5430437J10Rik	0.905455	0.06463	0	0
5430437P03Rik	27.3345	21.1094	38.7411	24.7003
5430440P10Rik	0	0	0	0
5530400C23Rik	0	0	0	0
5530401A14Rik	0	0	0	0
5530601H04Rik	1.25766	0.893542	0.369158	0.302156
5730403B10Rik	18.6304	19.8079	11.3208	2.87914
5730403I07Rik	0	0	0	0
5730405O15Rik	0	0	0	0
5730408K05Rik	3.68382	0.433754	0.69947	0.110247
5730409E04Rik	0.241362	1.33602	1.16449	0.571025
5730412P04Rik	0	0	0	0
5730416F02Rik	0.004959	0	0	0
5730419I09Rik	4.8917	6.61357	1.56827	0.278079
5730420D15Rik	0.027624	0.195715	0.047943	0
5730422E09Rik	0.019039	0	0.064004	0
5730435O14Rik	0.573593	0.612087	0.315999	0
5730437N04Rik	23.5638	15.0199	12.741	6.04167
5730455O13Rik	7.32828	3.38095	2.88982	0.266761
5730455P16Rik	1.17788	1.38006	0.369861	0.202782
5730457N03Rik	0	0	0	0
5730460C07Rik	0	0	0	0
5730469M10Rik	23.2732	17.7141	10.0963	1.57275
5730480H06Rik	0.470735	0	0.173471	0
5730494M16Rik	6.80031	2.44125	2.17571	0.460745
5730494N06Rik	31.4423	10.0225	18.8722	4.50842
5730507C01Rik	0.072089	0.044031	0.03131	0
5730508B09Rik	4.6214	0.694631	0.457544	0.716905
5730522E02Rik	0	0	0	0
5730528L13Rik	1.27902	1.10389	0.090099	0.134332
5730559C18Rik	0.055196	0	0	0.037426
5730577I03Rik	0.208919	0	0	0
5730590G19Rik	0.386224	1.6038	0.431673	0.107714
5830403L16Rik	0.019675	0	0	0
5830403M04Rik	0	0	0	0
5830411N06Rik	0.29767	0.903253	0.152955	0
5830415F09Rik	10.1186	6.65902	3.42358	0.477249
5830416I19Rik	0.155519	0	0.11849	0
5830416P10Rik	1.06481	1.58948	0.892639	0.198178
5830417I10Rik	1.60362	2.57063	1.1007	0.284528
5830418K08Rik	1.93186	2.14372	0.610772	0.052317
5830418P13Rik	0	0.053107	0.056411	0
5830428M24Rik	0.716645	0.228287	0.569548	0
5830432E09Rik	0.896139	0.494723	0.387536	0.22592
5830433M19Rik	1.07948	0.540404	0.12785	0.093433
5830473C10Rik	0.033827	0.277685	0.02783	0
5930403L14Rik	0.55029	0.825315	0.044288	0
5930412G12Rik	0.113545	0	0	0
5930416I19Rik	13.5542	10.2468	9.42657	3.31875
5930434B04Rik	12.6048	16.8146	9.8148	5.43223
[truncated: 21,338 more rows]
